# Supplementary material for: Omics approach to reveal the effects of obesity on the protein profiles of the exosomes derived from different adipose depots
Source: Research Square preprint supplement (doi:10.21203/rs.3.rs-1544257/v1), 2022-04-19
Supplement: Supplementary file 1 [file 15df5f463957a8db5f0343d9.xlsx]

## Sheet: Sheet 1
SAT-Exos injection (negative mode)
Compound.ID	ratio	t.test_p.value	t.test_p.value_BHcorrect	wilcox.test_p.value	wilcox.test_p.value_BHcorrect	VIP	sample	LCplatform	Name	Formula	Molecular.Weight	Actual.RT	KEGG.ID	mzCloud.ID..ChemSpider.ID	HMDB.ID	DeltaMass..Da.	DeltaMass..ppm.	mzVault.Best.Match	mzCloud.Best.Match	ChemSpider.Results	level	Super.class	Class	Sub.class	Family	Pathway	label
0.568_234.037	1.242	0.8021	0.9251	1	1	0.5058	SAT:PBS	C18:neg	2-(2-acetoxy-2-oxoethyl)-2-hydroxysuccinic acid	C8 H10 O8	234.037	0.568		S67159455	HMDB0059808	-0.0005	-2.3121			1	level4	Organic acids and derivatives	Carboxylic acids and derivatives	Tetracarboxylic acids and derivatives	Organic acids		other
0.569_218.0229	0.8768	0.1867	0.7494	0.4	0.7765	0.6648	SAT:PBS	C18:neg	Diphenyldisulfide	C12 H10 S2	218.023	0.569		S12861	HMDB0031823	0.0005	2.2452			3	level4	Benzenoids	Benzene and substituted derivatives	null	Benzene and derivatives		other
0.57_622.1284	0.9765	0.7068	0.8946	1	1	0.1225	SAT:PBS	C18:neg		C17 H31 N6 O15 P S	622.128	0.57								0	level5						other
0.576_914.2198	1.0094	0.8615	0.9459	0.7	0.8766	0.1208	SAT:PBS	C18:neg		C38 H49 N2 O18 P3	914.22	0.576								0	level5						other
0.585_239.9934	1.6401	0.8533	0.9442	1	1	0.663	SAT:PBS	C18:neg		C6 H8 O8 S	239.993	0.585								0	level5						other
0.592_292.09	1.1733	0.2083	0.7494	0.2	0.6759	0.7448	SAT:PBS	C18:neg	Ethylenediaminetetraacetic acid	C10 H16 N2 O8	292.09	0.592	C00284	S5826	HMDB0015109	-0.0007	-2.4198			1	level4	Organic acids and derivatives	Carboxylic acids and derivatives	Tetracarboxylic acids and derivatives	Organic acids	NULL	other
0.594_158.1052	1.1683	0.2798	0.7494	0.4	0.7765	0.6454	SAT:PBS	C18:neg		C7 H14 N2 O2	158.105	0.594								0	level5						other
0.594_248.1	1.2087	0.3479	0.7614	0.4	0.7765	0.8447	SAT:PBS	C18:neg	Glu-thr	C9 H16 N2 O6	248.1	0.594		S5365660	HMDB0028829	-0.0009	-3.4802			2	level4	Organic acids and derivatives	Carboxylic acids and derivatives	Amino acids, peptides, and analogues	Amino acids, peptides, and analogues		other
0.595_146.0213	0.9649	0.6471	0.8859	0.7	0.8766	0.2247	SAT:PBS	C18:neg	Oxoglutaric acid	C5 H6 O5	146.021	0.595	C00026	BGI458	HMDB0000208	-0.0003	-1.741	47.3	45.2	7	level3	Organic acids	Carboxylic acids [Fig]	2-Oxocarboxylic acids	Organic acids	map00020 Citrate cycle (TCA cycle); map00040 Pentose and glucuronate interconversions; map00053 Ascorbate and aldarate metabolism; map00220 Arginine biosynthesis; map00250 Alanine, aspartate and glutamate metabolism; map00310 Lysine degradation; map00340 Histidine metabolism; map00430 Taurine and hypotaurine metabolism; map00471 D-Glutamine and D-glutamate metabolism; map00630 Glyoxylate and dica…	other
0.595_210.0373	0.9611	0.6158	0.8637	0.7	0.8766	0.25	SAT:PBS	C18:neg	D-saccharic acid	C6 H10 O8	210.037	0.595	C00818	MReference-1498	HMDB0000663	-0.0003	-1.214		44.3	3	level3	Organic oxygen compounds	Organooxygen compounds	Carbohydrates and carbohydrate conjugates	Carbohydrates	map00053 Ascorbate and aldarate metabolism; map01100 Metabolic pathways;	other
0.596_112.0161	0.9676	0.8037	0.9251	1	1	0.1678	SAT:PBS	C18:neg	3-furoic acid	C5 H4 O3	112.016	0.596		MReference-1735	HMDB0000444	0	0.3281		90	4	level2	Organoheterocyclic compounds	Furans	Furoic acid and derivatives	Furoic acid and derivatives		other
0.597_202.0948	1.2179	0.3371	0.7614	0.4	0.7765	0.8641	SAT:PBS	C18:neg	L-coprine	C8 H14 N2 O4	202.095	0.597	C08271	S97180	HMDB0034266	-0.0005	-2.5513			6	level4	Fungal toxins	Mushroom toxins	Others	Fungal toxins	NULL	other
0.6_390.0576	1.0796	0.3889	0.7653	0.7	0.8766	0.4306	SAT:PBS	C18:neg	(2r)-3-[(hydroxy{[(2r,3s,5r,6s)-2,3,4,5,6-pentahydroxycyclohexyl]oxy}phosphoryl)oxy]-1,2-propanediyl diformate	C11 H19 O13 P	390.058	0.6		S59651627		0.0013	3.3477			2	level4						other
0.601_188.0792	0.9261	0.7024	0.8946	0.7	0.8766	0.3373	SAT:PBS	C18:neg	Aceglutamide	C7 H12 N2 O4	188.079	0.601		S158492	HMDB0006029	-0.0006	-2.9573			3	level4	Organic acids and derivatives	Carboxylic acids and derivatives	Amino acids, peptides, and analogues	Amino acids, peptides, and analogues		other
0.604_150.0161	1.0865	0.2624	0.7494	0.4	0.7765	0.1982	SAT:PBS	C18:neg	L-(+)-tartaric acid	C4 H6 O6	150.016	0.604	C00898	MReference-1245	HMDB0000956	-0.0003	-2.2933	97.6	98.2	4	level2	Organic oxygen compounds	Organooxygen compounds	Carbohydrates and carbohydrate conjugates	Carbohydrates	map00630 Glyoxylate and dicarboxylate metabolism; map01100 Metabolic pathways;	other
0.606_234.0845	0.9206	0.561	0.8368	0.7	0.8766	0.2922	SAT:PBS	C18:neg	Glu-ser	C8 H14 N2 O6	234.084	0.606		S5363587	HMDB0028828	-0.0007	-2.796			5	level4	Organic acids and derivatives	Carboxylic acids and derivatives	Amino acids, peptides, and analogues	Amino acids, peptides, and analogues		other
0.608_134.0215	0.994	0.9099	0.9659	1	1	0.157	SAT:PBS	C18:neg	D-(+)-malic acid	C4 H6 O5	134.022	0.608	C00497	MReference-1781	HMDB0031518	0	-0.3086	95.5	96.1	5	level2	Organic acids and derivatives	Hydroxy acids and derivatives	Beta hydroxy acids and derivatives	Organic acids	map00650 Butanoate metabolism; map01100 Metabolic pathways;	other
0.611_314.072	1.2129	0.08	0.6739	0.1	0.5784	0.7599	SAT:PBS	C18:neg	Valdecoxib	C16 H14 N2 O3 S	314.072	0.611	C21552	S106796	HMDB0005033	-0.0005	-1.7471			1	level4	Benzenoids	Benzene and substituted derivatives	Benzenesulfonamides	Benzene and derivatives	NULL	other
0.612_174.0162	1.0663	0.4892	0.8006	0.4	0.7765	0.2796	SAT:PBS	C18:neg	Trans-aconitic acid	C6 H6 O6	174.016	0.612	C02341	MReference-350	HMDB0000958	-0.0003	-1.5371	78.2	82.8	6	level2	Organic acids and derivatives	Carboxylic acids and derivatives	Tricarboxylic acids and derivatives	Organic acids	map01100 Metabolic pathways;	other
0.612_88.016	1.0307	0.9125	0.9659	1	1	0.1601	SAT:PBS	C18:neg	Pyruvic acid	C3 H4 O3	88.016	0.612	C00022	MReference-1264	HMDB0000243	-0.0001	-0.7241		81.4	6	level2	Organic acids and derivatives	Keto acids and derivatives	Alpha-keto acids and derivatives	Organic acids	map00010 Glycolysis / Gluconeogenesis; map00020 Citrate cycle (TCA cycle); map00030 Pentose phosphate pathway; map00040 Pentose and glucuronate interconversions; map00053 Ascorbate and aldarate metabolism; map00250 Alanine, aspartate and glutamate metabolism; map00260 Glycine, serine and threonine metabolism; map00270 Cysteine and methionine metabolism; map00290 Valine, leucine and isoleucine bio…	other
0.613_330.0457	1.312	0.1559	0.7307	0.2	0.6759	0.7253	SAT:PBS	C18:neg		C9 H19 N2 O5 P S2	330.046	0.613								0	level5						other
0.614_100.0159	0.9297	0.7065	0.8946	1	1	0.1855	SAT:PBS	C18:neg	Succinic anhydride	C4 H4 O3	100.016	0.614	C19524	S7634	HMDB0032523	-0.0001	-1.1102			1	level4	Organic acids and derivatives	Carboxylic acids and derivatives	Dicarboxylic acids and derivatives	Organic acids	NULL	other
0.614_116.0109	0.9854	0.8434	0.9407	1	1	0.1665	SAT:PBS	C18:neg	Fumaric acid	C4 H4 O4	116.011	0.614	C00122	MReference-1274	HMDB0000134	0	-0.0899	81.5	81.5	3	level2	Organic acids and derivatives	Carboxylic acids and derivatives	Dicarboxylic acids and derivatives	Organic acids	map00020 Citrate cycle (TCA cycle); map00190 Oxidative phosphorylation; map00220 Arginine biosynthesis; map00250 Alanine, aspartate and glutamate metabolism; map00350 Tyrosine metabolism; map00360 Phenylalanine metabolism; map00620 Pyruvate metabolism; map00650 Butanoate metabolism; map00760 Nicotinate and nicotinamide metabolism; map01100 Metabolic pathways; map01200 Carbon metabolism; map04922 …	other
0.614_97.9768	0.9603	0.6783	0.8946	1	1	0.197	SAT:PBS	C18:neg	Phosphoric acid	H3 O4 P	97.9768	0.614	C00009	S979	HMDB0001429	-0.0001	-0.6995			1	level4	Homogeneous non-metal compounds	Non-metal oxoanionic compounds	Non-metal phosphates	Non-metal phosphates	map00190 Oxidative phosphorylation; map02010 ABC transporters; map04928 Parathyroid hormone synthesis, secretion and action; map04978 Mineral absorption; map05012 Parkinson disease;	other
0.615_192.0268	0.963	0.6356	0.8804	0.7	0.8766	0.2345	SAT:PBS	C18:neg	Citrate	C6 H8 O7	192.027	0.615	C00158	BGI188	HMDB0000094	-0.0002	-1.035	96.9	92.2	13	level1	Organic acids	Carboxylic acids [Fig]	Tricarboxylic acids	Organic acids	map00020 Citrate cycle (TCA cycle); map00250 Alanine, aspartate and glutamate metabolism; map00630 Glyoxylate and dicarboxylate metabolism; map01100 Metabolic pathways; map01200 Carbon metabolism; map01210 2-Oxocarboxylic acid metabolism; map01230 Biosynthesis of amino acids; map04742 Taste transduction; map04922 Glucagon signaling pathway; map05230 Central carbon metabolism in cancer;	other
0.615_336.0539	1.0995	0.3204	0.7494	0.4	0.7765	0.3647	SAT:PBS	C18:neg		C8 H16 O14	336.054	0.615								0	level5						other
0.616_245.904	0.5201	0.1011	0.6996	0.1	0.5784	2.0005	SAT:PBS	C18:neg		C7 H Cl O4 P2	245.904	0.616								0	level5						other
0.617_118.0266	0.894	0.0323	0.4122	0.1	0.5784	0.4796	SAT:PBS	C18:neg	Succinate	C4 H6 O4	118.027	0.617	C00042	BGI525	HMDB0000254	0	0.2071	99	90.8	8	level1	Organic acids	Carboxylic acids [Fig]	Dicarboxylic acids	Organic acids	map00020 Citrate cycle (TCA cycle); map00190 Oxidative phosphorylation; map00250 Alanine, aspartate and glutamate metabolism; map00310 Lysine degradation; map00350 Tyrosine metabolism; map00360 Phenylalanine metabolism; map00620 Pyruvate metabolism; map00630 Glyoxylate and dicarboxylate metabolism; map00640 Propanoate metabolism; map00650 Butanoate metabolism; map00760 Nicotinate and nicotinamide…	other
0.617_235.8657	1.0918	0.7388	0.8991	1	1	0.3974	SAT:PBS	C18:neg		C6 H Cl S4	235.866	0.617								0	level5						other
0.617_415.9941	1.1809	0.6258	0.873	0.7	0.8766	0.5423	SAT:PBS	C18:neg		C6 H20 Cl N6 O3 P3 S2	415.994	0.617								0	level5						other
0.617_417.9909	0.7003	0.1787	0.7494	0.1	0.5784	1.223	SAT:PBS	C18:neg		C7 H16 O16 P2	417.991	0.617								0	level5						other
0.618_155.9258	1.0426	0.7368	0.8991	0.7	0.8766	0.2445	SAT:PBS	C18:neg	[similar to: adenosine 5'-phosphosulfate; δmass: -271.0941 da]		155.926	0.618								0	level5						other
0.618_303.8624	0.6839	0.3646	0.7626	0.7	0.8766	1.0545	SAT:PBS	C18:neg		C H3 Cl O10 P2 S	303.862	0.618								0	level5						other
0.618_352.0277	1.4579	0.0788	0.6739	0.1	0.5784	0.8028	SAT:PBS	C18:neg	Mfcd00060109	C17 H14 Cl2 O4	352.028	0.618	C14346	S67408		0.0008	2.3086			1	level4					NULL	other
0.619_223.9222	0.9962	0.8372	0.9356	1	1	0.2243	SAT:PBS	C18:neg		C4 H4 Cl N2 O P3	223.922	0.619								0	level5						other
0.619_331.8077	1.0282	0.7178	0.8946	0.7	0.8766	0.1329	SAT:PBS	C18:neg			331.808	0.619								0	level5						other
0.619_358.0357	1.2345	0.2399	0.7494	0.2	0.6759	0.7066	SAT:PBS	C18:neg	2-hydroxy-2-(9-hydroxy-7-oxo-2,3-dihydro-7h-furo[3,2-g]chromen-2-yl)propyl hydrogen sulfate	C14 H14 O9 S	358.036	0.619		S74853050	HMDB0132923	-0.0002	-0.4573			2	level4	Phenylpropanoids and polyketides	Coumarins and derivatives	Furanocoumarins	Coumarins and derivatives		other
0.62_136.0372	0.8926	0.0614	0.6041	0.1	0.5784	0.5073	SAT:PBS	C18:neg	Threonic acid, l-	C4 H8 O5	136.037	0.62		S388628		0	0.0426	97.5	89	5	level4						other
0.62_147.053	0.9381	0.5947	0.8541	0.7	0.8766	0.3119	SAT:PBS	C18:neg	Dl-glutamic acid	C5 H9 N O4	147.053	0.62	C00302	S591	HMDB0060475	-0.0002	-1.1132			13	level4	Organic acids and derivatives	Carboxylic acids and derivatives	Amino acids, peptides, and analogues	Amino acids, peptides, and analogues	map01100 Metabolic pathways;	other
0.62_451.9708	1.3318	0.5454	0.836	0.7	0.8766	0.8097	SAT:PBS	C18:neg		C10 H17 Cl N4 O6 S4	451.971	0.62								0	level5						other
0.62_473.9525	1.1815	0.3055	0.7494	0.4	0.7765	0.6425	SAT:PBS	C18:neg	Aerophobin 1	C15 H16 Br2 N4 O4	473.952	0.62	C17162	S8226207		-0.0013	-2.8181			1	level4					NULL	other
0.622_372.0306	1.0966	0.4523	0.7836	0.7	0.8766	0.4435	SAT:PBS	C18:neg		C8 H17 Cl O14	372.031	0.622								0	level5						other
0.622_431.9681	1.2947	0.3519	0.7626	0.7	0.8766	0.6502	SAT:PBS	C18:neg		C9 H16 Cl N6 O2 P3 S2	431.968	0.622								0	level5						other
0.623_213.8935	0.8129	0.2526	0.7494	0.2	0.6759	0.709	SAT:PBS	C18:neg			213.893	0.623								0	level5						other
0.624_235.8751	0.9325	0.6658	0.8915	0.7	0.8766	0.5247	SAT:PBS	C18:neg			235.875	0.624								0	level5						other
0.625_237.8722	0.818	0.0231	0.4046	0.1	0.5784	0.7636	SAT:PBS	C18:neg		C H2 O6 S4	237.872	0.625								0	level5						other
0.631_409.9775	0.9254	0.4909	0.8006	0.7	0.8766	0.356	SAT:PBS	C18:neg		C9 H16 Cl N2 O8 P S2	409.978	0.631								0	level5						other
0.631_525.8935	0.7355	0.3386	0.7614	0.4	0.7765	0.9592	SAT:PBS	C18:neg		C7 H18 Cl N4 O7 P3 S4	525.894	0.631								0	level5						other
0.633_327.766	1.2542	0.3399	0.7614	0.4	0.7765	0.8047	SAT:PBS	C18:neg			327.766	0.633								0	level5						other
0.633_352.019	1.0103	0.9202	0.9722	0.7	0.8766	0.0535	SAT:PBS	C18:neg		C5 H14 N4 O10 P2	352.019	0.633								0	level5						other
0.633_467.9355	0.8906	0.4807	0.8006	0.4	0.7765	0.6037	SAT:PBS	C18:neg		C6 H19 Cl N4 O6 P2 S4	467.935	0.633								0	level5						other
0.634_483.9092	1.0633	0.2594	0.7494	0.4	0.7765	0.4278	SAT:PBS	C18:neg		C7 H20 Cl N2 O6 P3 S4	483.909	0.634								0	level5						other
0.635_277.8391	1.1891	0.4445	0.7793	0.4	0.7765	0.7347	SAT:PBS	C18:neg			277.839	0.635								0	level5						other
0.635_337.7947	0.8769	0.6494	0.8864	1	1	0.4621	SAT:PBS	C18:neg			337.795	0.635								0	level5						other
0.635_394.0125	1.5387	0.0163	0.4046	0.1	0.5784	1.4618	SAT:PBS	C18:neg		C8 H18 Cl N4 O6 P3	394.012	0.635								0	level5						up
0.635_477.9643	0.861	0.3737	0.7626	0.7	0.8766	0.8127	SAT:PBS	C18:neg		C9 H13 Cl N6 O9 P2 S	477.964	0.635								0	level5						other
0.636_279.8362	0.8953	0.5182	0.8152	1	1	0.6924	SAT:PBS	C18:neg			279.836	0.636								0	level5						other
0.636_347.8235	1.3418	0.1376	0.7307	0.2	0.6759	1.1614	SAT:PBS	C18:neg		C2 H4 Cl O8 P3 S2	347.824	0.636								0	level5						other
0.636_535.9224	0.8508	0.504	0.8118	0.7	0.8766	0.5768	SAT:PBS	C18:neg		C7 H11 Cl N4 O18 P2	535.922	0.636								0	level5						other
0.637_219.8807	1.0667	0.6597	0.8895	1	1	0.4496	SAT:PBS	C18:neg	[similar to: citric acid; δmass: 27.8537 da]		219.881	0.637								0	level5						other
0.637_353.7688	0.9607	0.7146	0.8946	0.7	0.8766	0.2626	SAT:PBS	C18:neg			353.769	0.637								0	level5						other
0.637_395.7532	1.0162	0.9684	0.99	0.7	0.8766	0.0871	SAT:PBS	C18:neg			395.753	0.637								0	level5						other
0.637_425.9511	0.706	0.0217	0.4046	0.1	0.5784	1.4095	SAT:PBS	C18:neg		C5 H9 Cl N6 O11 P2	425.951	0.637								0	level5						down
0.639_295.8101	0.8954	0.7035	0.8946	1	1	0.3828	SAT:PBS	C18:neg		C3 H4 Cl P3 S4	295.81	0.639								0	level5						other
0.639_363.7975	1.1076	0.2438	0.7494	0.4	0.7765	0.3449	SAT:PBS	C18:neg		C5 H2 O5 P2 S5	363.798	0.639								0	level5						other
0.64_420.0061	0.9269	0.5236	0.8167	1	1	0.4299	SAT:PBS	C18:neg		C12 H14 N4 O7 P2 S	420.006	0.64								0	level5						other
0.641_237.8515	1.3082	0.4087	0.769	0.7	0.8766	0.8672	SAT:PBS	C18:neg			237.851	0.641								0	level5						other
0.641_345.8263	1.0716	0.6991	0.8946	1	1	0.3384	SAT:PBS	C18:neg			345.826	0.641								0	level5						other
0.642_182.9728	0.8584	0.5617	0.8368	0.7	0.8766	0.5283	SAT:PBS	C18:neg		C7 H2 Cl N O3	182.973	0.642								0	level5						other
0.642_493.938	0.9785	0.8354	0.9354	1	1	0.2001	SAT:PBS	C18:neg		C9 H15 N6 O6 P S5	493.938	0.642								0	level5						other
0.644_117.9909	1.117	0.7481	0.9065	0.7	0.8766	0.6199	SAT:PBS	C18:neg	[similar to: docosahexaenoyl ethanolamide; δmass: -253.2915 da]		117.991	0.644								0	level5						other
0.644_393.9998	0.8605	0.2821	0.7494	0.2	0.6759	0.6572	SAT:PBS	C18:neg		C12 H15 Cl N4 O3 S3	394	0.644								0	level5						other
0.645_261.986	1.0665	0.7419	0.9009	1	1	0.3952	SAT:PBS	C18:neg		C5 H11 Cl N2 O4 S2	261.986	0.645								0	level5						other
0.652_146.069	0.9143	0.697	0.8946	0.7	0.8766	0.3255	SAT:PBS	C18:neg	L-glutamine	C5 H10 N2 O3	146.069	0.652	C00064	BGI357	HMDB0000641	-0.0001	-0.6963	92.8	84.3	6	level1	Peptides	Amino acids	Common amino acids [Fig]	Amino acids	map00220 Arginine biosynthesis; map00230 Purine metabolism; map00240 Pyrimidine metabolism; map00250 Alanine, aspartate and glutamate metabolism; map00471 D-Glutamine and D-glutamate metabolism; map00630 Glyoxylate and dicarboxylate metabolism; map00910 Nitrogen metabolism; map00970 Aminoacyl-tRNA biosynthesis; map01100 Metabolic pathways; map01230 Biosynthesis of amino acids; map02010 ABC transp…	other
0.652_336.0412	0.9225	0.6276	0.873	0.7	0.8766	0.6925	SAT:PBS	C18:neg		C9 H13 Cl N6 O4 S	336.041	0.652								0	level5						other
0.656_204.0272	1.227	0.7823	0.9163	0.7	0.8766	0.5185	SAT:PBS	C18:neg	1-oxo-1,2,4-butanetricarboxylic acid	C7 H8 O7	204.027	0.656	C05533	S389591		0.0002	0.9632			2	level4					map01210 2-Oxocarboxylic acid metabolism;	other
0.657_404.0286	0.9344	0.7171	0.8946	1	1	0.2534	SAT:PBS	C18:neg		C11 H13 N6 O7 P S	404.029	0.657								0	level5						other
0.658_155.9353	0.6086	0.2437	0.7494	0.2	0.6759	1.4634	SAT:PBS	C18:neg	[similar to: adenosine 5'-phosphosulfate; δmass: -271.0846 da]		155.935	0.658								0	level5						other
0.658_293.0784	0.5456	0.0261	0.4046	0.1	0.5784	1.3551	SAT:PBS	C18:neg		C10 H16 Cl N3 O5	293.078	0.658								0	level5						down
0.66_270.032	2.1508	0.0687	0.6428	0.1	0.5784	2.0799	SAT:PBS	C18:neg		C8 H15 O6 P S	270.032	0.66								0	level5						other
0.66_345.025	0.4568	0.1576	0.7307	0.2	0.6759	1.5935	SAT:PBS	C18:neg		C6 H13 N5 O8 P2	345.025	0.66								0	level5						other
0.661_177.0165	1.7788	0.3399	0.7614	0.4	0.7765	1.3619	SAT:PBS	C18:neg			177.017	0.661								0	level5						other
0.662_287.0665	0.5499	0.152	0.7307	0.4	0.7765	1.4829	SAT:PBS	C18:neg		C6 H20 N5 P3 S	287.067	0.662								0	level5						other
0.662_395.9782	1.6448	0.3535	0.7626	0.7	0.8766	1.2685	SAT:PBS	C18:neg			395.978	0.662								0	level5						other
0.666_270.0944	1.283	0.0232	0.4046	0.1	0.5784	1.2398	SAT:PBS	C18:neg		C9 H18 O9	270.094	0.666								0	level5						up
0.666_336.0539	1.1535	0.4272	0.7706	0.7	0.8766	0.4764	SAT:PBS	C18:neg		C5 H18 N6 O5 P2 S	336.054	0.666								0	level5						other
0.671_147.9902	1.226	0.2188	0.7494	0.4	0.7765	0.8934	SAT:PBS	C18:neg	[similar to: α,α-trehalose; δmass: -194.1260 da]		147.99	0.671								0	level5						other
0.674_216.0397	1.0967	0.3666	0.7626	0.4	0.7765	0.3166	SAT:PBS	C18:neg	2-c-methylerythritol 4-phosphate	C5 H13 O7 P	216.04	0.674	C11434	S391470		-0.0002	-0.7699	75.9		1	level4					map00900 Terpenoid backbone biosynthesis; map01100 Metabolic pathways;	other
0.675_374.0097	1.4152	0.2371	0.7494	0.4	0.7765	0.9459	SAT:PBS	C18:neg		C12 H13 Cl N4 O4 P2	374.01	0.675								0	level5						other
0.683_126.0082	2.0484	0.0737	0.6739	0.1	0.5784	2.2294	SAT:PBS	C18:neg	Tc2700000	C2 H7 O4 P	126.008	0.683		S12582	HMDB0061734	0	0.1836			3	level4	Organic acids and derivatives	Organic phosphoric acids and derivatives	Phosphate esters	Organic acids		other
0.688_189.0275	1.1353	0.3752	0.7626	0.4	0.7765	0.4342	SAT:PBS	C18:neg		C6 H7 N O6	189.028	0.688								0	level5						other
0.691_145.9744	1.3041	0.2539	0.7494	0.4	0.7765	0.9444	SAT:PBS	C18:neg	[similar to: n-acetyl-l-glutamine; δmass: -42.1053 da]		145.974	0.691								0	level5						other
0.691_155.0692	1.3711	0.1781	0.7494	0.1	0.5784	1.1442	SAT:PBS	C18:neg	L-histidine	C6 H9 N3 O2	155.069	0.691	C00135	MReference-473	HMDB0000177	-0.0002	-1.5681		73	5	level2	Organic acids and derivatives	Carboxylic acids and derivatives	Amino acids, peptides, and analogues	Amino acids	map00340 Histidine metabolism; map00410 beta-Alanine metabolism; map00970 Aminoacyl-tRNA biosynthesis; map01100 Metabolic pathways; map01230 Biosynthesis of amino acids; map02010 ABC transporters; map04974 Protein digestion and absorption; map05230 Central carbon metabolism in cancer;	other
0.691_168.0281	0.794	0.0322	0.4122	0.1	0.5784	0.7497	SAT:PBS	C18:neg	Uric acid	C5 H4 N4 O3	168.028	0.691	C00366	MReference-753	HMDB0000289	-0.0002	-1.4367		88.3	1	level2	Organoheterocyclic compounds	Imidazopyrimidines	Purines and purine derivatives	Purines and derivatives	map00230 Purine metabolism; map01100 Metabolic pathways; map04976 Bile secretion;	other
0.696_198.0289	1.0448	0.71	0.8946	1	1	0.2534	SAT:PBS	C18:neg		C6 H11 Cl O5	198.029	0.696								0	level5						other
0.697_331.8941	1.0923	0.5538	0.8368	0.4	0.7765	0.2966	SAT:PBS	C18:neg		C4 H11 Cl O5 P2 S3	331.894	0.697								0	level5						other
0.697_373.8266	1.0086	0.9752	0.9911	1	1	0.1845	SAT:PBS	C18:neg		C H2 Cl N4 O7 P3 S2	373.827	0.697								0	level5						other
0.699_180.0631	1.0699	0.6094	0.8589	1	1	0.3426	SAT:PBS	C18:neg	D-tagatose	C6 H12 O6	180.063	0.699	C00795	BGI252		-0.0003	-1.7482	98.3	96	58	level1	Carbohydrates	Monosaccharides	Ketoses [Fig]	Carbohydrates	map00052 Galactose metabolism; map01100 Metabolic pathways;	other
0.699_333.8912	1.275	0.2049	0.7494	0.4	0.7765	1.0583	SAT:PBS	C18:neg	Chlorethoxyfos	C6 H11 Cl4 O3 P S	333.891	0.699	C18677	S82758		-0.0009	-2.6187			1	level4					NULL	other
0.701_216.0598	1.3281	0.1108	0.6996	0.1	0.5784	1.0128	SAT:PBS	C18:neg		C5 H8 N6 O4	216.06	0.701								0	level5						other
0.701_371.8294	1.28	0.3795	0.7653	0.7	0.8766	1.1004	SAT:PBS	C18:neg		C H3 Cl N6 O3 P2 S4	371.829	0.701								0	level5						other
0.702_162.0057	0.9428	0.8344	0.9354	1	1	0.1454	SAT:PBS	C18:neg	2-chloro-1-ethoxy-1,1,2-trifluoroethane	C4 H6 Cl F3 O	162.006	0.702	C14700	S119928		-0.0003	-1.5624			1	level4					NULL	other
0.702_305.8389	0.913	0.4538	0.7836	0.4	0.7765	0.5614	SAT:PBS	C18:neg		C4 H Cl O6 P2 S2	305.839	0.702								0	level5						other
0.705_281.8333	1.117	0.6004	0.8541	1	1	0.6981	SAT:PBS	C18:neg			281.833	0.705								0	level5						other
0.706_219.8806	1.8638	0.2809	0.7494	0.1	0.5784	2.3509	SAT:PBS	C18:neg			219.881	0.706								0	level5						other
0.706_284.1099	0.9203	0.4693	0.7928	0.4	0.7765	0.326	SAT:PBS	C18:neg		C10 H20 O9	284.11	0.706								0	level5						other
0.706_303.8418	1.1773	0.5735	0.8444	0.7	0.8766	0.6797	SAT:PBS	C18:neg			303.842	0.706								0	level5						other
0.707_279.8363	0.8235	0.049	0.5086	0.1	0.5784	0.821	SAT:PBS	C18:neg			279.836	0.707								0	level5						other
0.708_103.9641	0.9821	0.5547	0.8368	1	1	0.1545	SAT:PBS	C18:neg	[similar to: docosahexaenoyl ethanolamide; δmass: -267.3183 da]		103.964	0.708								0	level5						other
0.708_172.0345	0.7382	0.1628	0.7338	0.4	0.7765	0.9583	SAT:PBS	C18:neg		C3 H4 N6 O3	172.035	0.708								0	level5						other
0.708_221.8777	1.0288	0.7708	0.9096	1	1	0.1242	SAT:PBS	C18:neg		C5 H2 Cl P3 S	221.878	0.708								0	level5						other
0.708_295.8101	0.5129	0.12	0.7163	0.1	0.5784	2.3637	SAT:PBS	C18:neg		C H3 N2 P3 S5	295.81	0.708								0	level5						other
0.709_277.8391	0.9624	0.7621	0.9087	0.7	0.8766	0.24	SAT:PBS	C18:neg			277.839	0.709								0	level5						other
0.709_355.8552	1.448	0.1456	0.7307	0.2	0.6759	1.1802	SAT:PBS	C18:neg		C5 H7 Cl O6 P2 S3	355.855	0.709								0	level5						other
0.709_357.8521	0.9242	0.5156	0.8152	0.7	0.8766	0.4	SAT:PBS	C18:neg		C4 H3 Cl O11 S3	357.852	0.709								0	level5						other
0.71_245.8831	1.0672	0.57	0.8415	1	1	0.3531	SAT:PBS	C18:neg			245.883	0.71								0	level5						other
0.711_229.9094	0.8416	0.0791	0.6739	0.1	0.5784	0.9629	SAT:PBS	C18:neg		C7 H Cl O3 P2	229.909	0.711								0	level5						other
0.712_119.938	1.0425	0.7255	0.8946	0.7	0.8766	0.1793	SAT:PBS	C18:neg	[similar to: d-(+)-glucose; δmass: -60.1254 da]		119.938	0.712								0	level5						other
0.712_289.8649	0.8959	0.1226	0.7166	0.2	0.6759	0.4368	SAT:PBS	C18:neg		C3 H2 Cl N2 O4 P3 S	289.865	0.712								0	level5						other
0.713_210.0733	1.2019	0.1488	0.7307	0.1	0.5784	0.6836	SAT:PBS	C18:neg	Hept-2-ulose	C7 H14 O7	210.073	0.713		S92980		-0.0007	-3.1865			5	level4						other
0.714_115.0632	1.2208	0.3937	0.7665	0.7	0.8766	0.7333	SAT:PBS	C18:neg	L-proline	C5 H9 N O2	115.063	0.714	C00148	S128566	HMDB0000162	-0.0001	-0.6516			6	level4	Organic acids and derivatives	Carboxylic acids and derivatives	Amino acids, peptides, and analogues	Amino acids	map00330 Arginine and proline metabolism; map00970 Aminoacyl-tRNA biosynthesis; map01100 Metabolic pathways; map01230 Biosynthesis of amino acids; map02010 ABC transporters; map04974 Protein digestion and absorption; map04978 Mineral absorption; map05230 Central carbon metabolism in cancer;	other
0.715_230.0549	0.7477	0.2817	0.7494	0.4	0.7765	0.5793	SAT:PBS	C18:neg		C7 H15 Cl O6	230.055	0.715								0	level5						other
0.719_90.0316	1.0642	0.5202	0.8152	0.7	0.8766	0.2762	SAT:PBS	C18:neg	L-(+)-lactic acid	C3 H6 O3	90.0316	0.719	C00186	MReference-2582	HMDB0000190	0	-0.5095		83.7	11	level2	Organic acids and derivatives	Hydroxy acids and derivatives	Alpha hydroxy acids and derivatives	Organic acids	map00010 Glycolysis / Gluconeogenesis; map00051 Fructose and mannose metabolism; map00620 Pyruvate metabolism; map00640 Propanoate metabolism; map01100 Metabolic pathways; map04024 cAMP signaling pathway; map04066 HIF-1 signaling pathway; map04922 Glucagon signaling pathway; map05230 Central carbon metabolism in cancer;	other
0.72_313.8706	0.8565	0.3926	0.7665	0.7	0.8766	0.7315	SAT:PBS	C18:neg		C3 H4 Cl O9 P S2	313.871	0.72								0	level5						other
0.72_367.8819	1.0082	0.9431	0.9816	0.7	0.8766	0.1109	SAT:PBS	C18:neg		C4 H2 O16 P2	367.882	0.72								0	level5						other
0.721_409.9104	1.2766	0.3471	0.7614	0.4	0.7765	0.924	SAT:PBS	C18:neg		C5 H10 Cl N6 O4 P3 S2	409.91	0.721								0	level5						other
0.721_419.9389	1.4724	0.3046	0.7494	0.4	0.7765	1.6002	SAT:PBS	C18:neg		C6 H11 N6 O6 P3 S2	419.939	0.721								0	level5						other
0.722_297.8968	0.8746	0.1602	0.7307	0.4	0.7765	0.8099	SAT:PBS	C18:neg		C3 H7 Cl N2 O4 S4	297.897	0.722								0	level5						other
0.723_240.0838	0.8624	0.1313	0.7307	0.1	0.5784	0.2947	SAT:PBS	C18:neg		C8 H16 O8	240.084	0.723								0	level5						other
0.723_423.8425	1.0218	0.9611	0.99	1	1	0.0773	SAT:PBS	C18:neg		C2 H6 Cl N4 O9 P S4	423.842	0.723								0	level5						other
0.725_182.9728	0.931	0.8503	0.9441	1	1	0.2241	SAT:PBS	C18:neg		C7 H2 Cl N O3	182.973	0.725								0	level5						other
0.725_381.8581	1.0461	0.6008	0.8541	0.7	0.8766	0.2723	SAT:PBS	C18:neg		C5 H9 Cl N4 P2 S5	381.858	0.725								0	level5						other
0.726_365.8841	0.8877	0.2426	0.7494	0.4	0.7765	0.6179	SAT:PBS	C18:neg		C3 H6 Cl N6 O3 P3 S2	365.884	0.726								0	level5						other
0.728_175.0371	1.3537	0.1783	0.7494	0.2	0.6759	1.1364	SAT:PBS	C18:neg			175.037	0.728								0	level5						other
0.729_171.9513	0.9652	0.4973	0.8063	0.4	0.7765	0.2093	SAT:PBS	C18:neg		C3 H6 Cl O2 P S	171.951	0.729								0	level5						other
0.731_187.9249	0.961	0.6036	0.8551	0.7	0.8766	0.2423	SAT:PBS	C18:neg			187.925	0.731								0	level5						other
0.731_229.092	1.5903	0.0168	0.4046	0.1	0.5784	1.8623	SAT:PBS	C18:neg		C5 H15 N3 O7	229.092	0.731								0	level5						up
0.733_185.0659	1.4052	0.0091	0.4046	0.1	0.5784	1.3763	SAT:PBS	C18:neg	[similar to: n-acetyl-dl-norvaline; δmass: 25.9764 da]		185.066	0.733								0	level5						up
0.733_255.912	1.0911	0.6742	0.8946	0.7	0.8766	0.3498	SAT:PBS	C18:neg		C4 H4 Cl N2 O3 P3	255.912	0.733								0	level5						other
0.733_297.1416	1.2796	0.5638	0.8368	1	1	0.6643	SAT:PBS	C18:neg		C11 H23 N O8	297.142	0.733								0	level5						other
0.734_239.9384	1.0458	0.7285	0.8946	0.7	0.8766	0.3107	SAT:PBS	C18:neg		C2 H2 Cl N6 O2 P S	239.938	0.734								0	level5						other
0.734_449.8452	1.0087	0.9083	0.9659	1	1	0.1408	SAT:PBS	C18:neg		C3 H9 Cl N6 O4 P2 S5	449.845	0.734								0	level5						other
0.735_239.0316	2.4632	0.0378	0.4516	0.1	0.5784	2.3678	SAT:PBS	C18:neg		C6 H10 Cl N3 O5	239.032	0.735								0	level5						up
0.735_433.8714	0.8963	0.0901	0.6739	0.2	0.6759	0.5193	SAT:PBS	C18:neg		C8 H9 Cl N4 O3 P2 S4	433.871	0.735								0	level5						other
0.737_323.8995	1.1856	0.2403	0.7494	0.2	0.6759	0.8513	SAT:PBS	C18:neg		C3 H8 Cl N4 O2 P3 S2	323.899	0.737								0	level5						other
0.737_351.9517	1.2624	0.6644	0.8915	0.7	0.8766	0.6735	SAT:PBS	C18:neg		C8 H15 Cl O5 P2 S2	351.952	0.737								0	level5						other
0.738_162.0526	1.2562	0.4635	0.788	1	1	0.942	SAT:PBS	C18:neg	Diethylpyrocarbonate	C6 H10 O5	162.053	0.738	C11592	S2943	HMDB0032873	-0.0002	-1.0447			31	level4	Organic acids and derivatives	Organic carbonic acids and derivatives	null	Organic acids	NULL	other
0.738_391.8869	0.9498	0.5176	0.8152	0.7	0.8766	0.2596	SAT:PBS	C18:neg		C6 H8 Cl N4 O4 P3 S2	391.887	0.738								0	level5						other
0.74_307.9256	0.9538	0.5249	0.8167	0.7	0.8766	0.2955	SAT:PBS	C18:neg		C4 H6 Cl N2 O8 P S	307.926	0.74								0	level5						other
0.741_375.913	0.9829	0.8257	0.9325	1	1	0.2008	SAT:PBS	C18:neg		C3 H7 Cl N2 O13 P2	375.913	0.741								0	level5						other
0.742_102.0317	0.9777	0.8515	0.9441	1	1	0.1517	SAT:PBS	C18:neg	2-oxobutyric acid	C4 H6 O3	102.032	0.742	C00109	S57	HMDB0000005	0	-0.0045			9	level4	Organic acids and derivatives	Keto acids and derivatives	Short-chain keto acids and derivatives	Organic acids	map00260 Glycine, serine and threonine metabolism; map00270 Cysteine and methionine metabolism; map00290 Valine, leucine and isoleucine biosynthesis; map00640 Propanoate metabolism; map01100 Metabolic pathways; map01210 2-Oxocarboxylic acid metabolism; map01230 Biosynthesis of amino acids;	other
0.743_459.874	1.0034	0.9735	0.9911	1	1	0.1704	SAT:PBS	C18:neg		C4 H6 Cl N6 O10 P S3	459.874	0.743								0	level5						other
0.746_443.9002	0.9691	0.7587	0.9076	0.7	0.8766	0.3792	SAT:PBS	C18:neg		C7 H3 Cl N6 O11 P2	443.9	0.746								0	level5						other
0.747_279.9305	0.7874	0.2527	0.7494	0.4	0.7765	0.9915	SAT:PBS	C18:neg		C4 H7 Cl O8 P2	279.93	0.747								0	level5						other
0.749_333.9284	0.9654	0.7266	0.8946	0.7	0.8766	0.2112	SAT:PBS	C18:neg	Costatol	C10 H14 Br Cl3 O	333.928	0.749	C17103	S10260525		-0.0009	-2.8442			1	level4					NULL	other
0.75_120.0422	0.8905	0.6004	0.8541	1	1	0.716	SAT:PBS	C18:neg	D-(−)-threose	C4 H8 O4	120.042	0.75		S388736		0	-0.2047		33.5	13	level4						other
0.75_197.9537	0.8253	0.3901	0.7653	0.7	0.8766	0.8256	SAT:PBS	C18:neg		C H4 N4 O2 P2 S	197.954	0.75								0	level5						other
0.75_265.9408	0.9094	0.2909	0.7494	0.2	0.6759	0.4867	SAT:PBS	C18:neg		C3 H8 O8 P2 S	265.941	0.75								0	level5						other
0.751_317.9545	1.0227	0.8228	0.9325	1	1	0.1132	SAT:PBS	C18:neg	Mitotane	C14 H10 Cl4	317.954	0.751		S4066	HMDB0014786	0.0008	2.6559			3	level4	Benzenoids	Benzene and substituted derivatives	Diphenylmethanes	Benzene and derivatives		other
0.751_385.9418	0.9345	0.4858	0.8006	0.7	0.8766	0.3549	SAT:PBS	C18:neg		C5 H4 N6 O11 P2	385.942	0.751								0	level5						other
0.752_249.9672	0.9989	0.9511	0.9862	0.7	0.8766	0.1548	SAT:PBS	C18:neg		C2 H7 N2 O8 P S	249.967	0.752								0	level5						other
0.754_226.006	1.7105	0.1385	0.7307	0.2	0.6759	1.8293	SAT:PBS	C18:neg		C6 H11 O5 P S	226.006	0.754								0	level5						other
0.757_181.9801	0.9866	0.9875	0.9929	0.7	0.8766	0.0149	SAT:PBS	C18:neg		C4 H7 O4 P S	181.98	0.757								0	level5						other
0.758_114.0317	0.8592	0.9048	0.9659	0.7	0.8766	0.1583	SAT:PBS	C18:neg	4-hydroxy-5-methylfuran-3(2h)-one	C5 H6 O3	114.032	0.758		S3757733	HMDB0031859	0	-0.1847			4	level4	Organoheterocyclic compounds	Dihydrofurans	Furanones	Furanones		other
0.759_226.0685	1.1368	0.5664	0.8383	1	1	0.6669	SAT:PBS	C18:neg	Glucoheptonic acid	C7 H14 O8	226.069	0.759		S55750	HMDB0240292	-0.0004	-1.7573		85	1	level4	Organic oxygen compounds	Organooxygen compounds	Carbohydrates and carbohydrate conjugates	Carbohydrates		other
0.76_207.009	1.3695	0.1839	0.7494	0.2	0.6759	1.0066	SAT:PBS	C18:neg	Quinoclamine	C10 H6 Cl N O2	207.009	0.76	C18584	S16770		0.0003	1.4739			1	level4					NULL	other
0.762_129.9668	1.1551	0.1502	0.7307	0.2	0.6759	0.5357	SAT:PBS	C18:neg	[similar to: dl-β-leucine; δmass: -1.1278 da]		129.967	0.762								0	level5						other
0.764_116.028	5.7602	0.3877	0.7653	0.4	0.7765	1.8348	SAT:PBS	C18:neg	[similar to: 5-aminovaleric acid; δmass: -1.0510 da]		116.028	0.764								0	level5						other
0.779_202.0646	3.7622	0.5178	0.8152	0.7	0.8766	1.3322	SAT:PBS	C18:neg		C5 H10 N6 O S	202.065	0.779								0	level5						other
0.782_270.0944	1.0747	0.284	0.7494	0.4	0.7765	0.3442	SAT:PBS	C18:neg		C9 H18 O9	270.094	0.782								0	level5						other
0.787_329.1137	1.5082	0.1908	0.7494	0.2	0.6759	1.3034	SAT:PBS	C18:neg		C13 H20 N3 O5 P	329.114	0.787								0	level5						other
0.804_187.0526	2.7526	0.929	0.9778	0.7	0.8766	0.8508	SAT:PBS	C18:neg			187.053	0.804								0	level5						other
0.81_239.0456	0.5776	0.1382	0.7307	0.2	0.6759	1.4854	SAT:PBS	C18:neg		C9 H10 N3 O3 P	239.046	0.81								0	level5						other
0.815_217.038	1.7762	0.0859	0.6739	0.1	0.5784	1.9089	SAT:PBS	C18:neg	[similar to: n-acetyl-l-methionine; δmass: 25.9764 da]		217.038	0.815								0	level5						other
0.816_117.079	1.2975	0.0445	0.4999	0.1	0.5784	1.0712	SAT:PBS	C18:neg	5-aminovaleric acid	C5 H11 N O2	117.079	0.816	C00431	MReference-251	HMDB0003355	0	0.1509		86.6	15	level2	Organic acids and derivatives	Carboxylic acids and derivatives	Amino acids, peptides, and analogues	Amino acids, peptides, and analogues	map00310 Lysine degradation; map00330 Arginine and proline metabolism; map01100 Metabolic pathways;	up
0.817_278.0803	2.5278	0.4568	0.7836	0.7	0.8766	1.1865	SAT:PBS	C18:neg	2-(1,2-dihydroxy-2-propanyl)-9-hydroxy-2,3-dihydro-7h-furo[3,2-g]chromen-7-one	C14 H14 O6	278.08	0.817		S74853048	HMDB0132919	0.0013	4.5824			2	level4	Phenylpropanoids and polyketides	Coumarins and derivatives	Furanocoumarins	Coumarins and derivatives		other
0.819_240.0838	0.8473	0.1845	0.7494	0.1	0.5784	0.3433	SAT:PBS	C18:neg		C8 H16 O8	240.084	0.819								0	level5						other
0.825_294.0558	0.7719	0.2483	0.7494	0.2	0.6759	1.0143	SAT:PBS	C18:neg	2-hydroxy-1,2-diphenylethyl hydrogen sulfate	C14 H14 O5 S	294.056	0.825		S74853754	HMDB0135202	-0.0004	-1.4515			1	level4	Phenylpropanoids and polyketides	Stilbenes	null	Polyketides[PK]		other
0.834_181.0737	2.0424	0.0276	0.4046	0.1	0.5784	2.065	SAT:PBS	C18:neg	Dl-tyrosine	C9 H11 N O3	181.074	0.834	C01536	S1121		-0.0002	-0.9355			15	level4					NULL	up
0.843_174.1115	0.9661	0.9478	0.9847	0.7	0.8766	0.0415	SAT:PBS	C18:neg	Dl-arginine	C6 H14 N4 O2	174.112	0.843	C02385	MReference-408		-0.0002	-1.1618		87.1	3	level2					NULL	other
0.854_367.1158	0.9866	0.9887	0.9929	1	1	0.0455	SAT:PBS	C18:neg			367.116	0.854								0	level5						other
0.855_368.1123	0.9419	0.7977	0.9227	1	1	0.1653	SAT:PBS	C18:neg	3-o-feruloyl-d-quinic acid	C17 H20 O9	368.112	0.855	C02572	S7975151	HMDB0030669	0.0016	4.275			5	level4	Organic oxygen compounds	Organooxygen compounds	Alcohols and polyols	Alcohols	NULL	other
0.948_240.0838	0.8648	0.111	0.6996	0.2	0.6759	0.3415	SAT:PBS	C18:neg		C8 H16 O8	240.084	0.948								0	level5						other
0.971_112.0273	0.8964	0.4271	0.7706	0.7	0.8766	0.3149	SAT:PBS	C18:neg	Uracil	C4 H4 N2 O2	112.027	0.971	C00106	MReference-2531	HMDB0000300	0	-0.1048		81.3	3	level1	Organoheterocyclic compounds	Diazines	Pyrimidines and pyrimidine derivatives	Pyrimidines and pyrimidine derivatives	map00240 Pyrimidine metabolism; map00410 beta-Alanine metabolism; map00770 Pantothenate and CoA biosynthesis; map01100 Metabolic pathways;	other
1.042_279.1312	1.1335	0.754	0.9076	0.7	0.8766	0.5415	SAT:PBS	C18:neg	(2s)-3-methyl-2-({[(3s,4s,5r)-2,3,4-trihydroxy-5-(hydroxymethyl)tetrahydro-2-furanyl]methyl}amino)butanoic acid (non-preferred name)	C11 H21 N O7	279.131	1.042		S35014481	HMDB0037844	-0.0006	-2.2209			1	level4	Organic acids and derivatives	Carboxylic acids and derivatives	Amino acids, peptides, and analogues	Amino acids, peptides, and analogues		other
1.048_159.9856	0.7658	0.3145	0.7494	0.4	0.7765	0.7069	SAT:PBS	C18:neg		C4 H5 N2 O P S	159.986	1.048								0	level5						other
1.052_189.0997	0.9824	0.9688	0.99	1	1	0.1162	SAT:PBS	C18:neg	(+)-castanospermine	C8 H15 N O4	189.1	1.052	C02256	S49177		-0.0004	-2.1568			12	level4	Alkaloids	Alkaloids derived from lysine	Indolizidine alkaloids	Alkaloids	NULL	other
1.069_181.0737	1.8736	0.0236	0.4046	0.1	0.5784	2.1854	SAT:PBS	C18:neg	L-tyrosine	C9 H11 N O3	181.074	1.069	C00082	MReference-2255	HMDB0000158	-0.0002	-0.9683		92.2	15	level1	Organic acids and derivatives	Carboxylic acids and derivatives	Amino acids, peptides, and analogues	Amino acids	map00130 Ubiquinone and other terpenoid-quinone biosynthesis; map00350 Tyrosine metabolism; map00360 Phenylalanine metabolism; map00400 Phenylalanine, tyrosine and tryptophan biosynthesis; map00730 Thiamine metabolism; map00970 Aminoacyl-tRNA biosynthesis; map01100 Metabolic pathways; map01210 2-Oxocarboxylic acid metabolism; map01230 Biosynthesis of amino acids; map04728 Dopaminergic synapse; ma…	up
1.069_361.1366	1.4976	0.4716	0.7928	0.7	0.8766	0.9204	SAT:PBS	C18:neg		C15 H23 N O9	361.137	1.069								0	level5						other
1.081_259.9984	2.2224	0.0643	0.6222	0.1	0.5784	1.2817	SAT:PBS	C18:neg	Caffeic acid 3-sulfate	C9 H8 O7 S	259.998	1.081		S30777605	HMDB0041706	-0.0007	-2.7472			7	level4	Phenylpropanoids and polyketides	Cinnamic acids and derivatives	Hydroxycinnamic acids and derivatives	Polyketides[PK]		other
1.135_158.0576	1.7268	0.041	0.4698	0.1	0.5784	1.2166	SAT:PBS	C18:neg	Succinylacetone	C7 H10 O4	158.058	1.135		S5121	HMDB0000635	-0.0003	-1.8558			8	level4	Organic acids and derivatives	Keto acids and derivatives	Medium-chain keto acids and derivatives	Organic acids		up
1.142_199.0816	1.7185	0.0253	0.4046	0.1	0.5784	1.9231	SAT:PBS	C18:neg	[similar to: n-acetyl-d-alloisoleucine; δmass: 25.9764 da]		199.082	1.142								0	level5						up
1.169_182.0577	0.9095	0.9544	0.9878	1	1	0.0956	SAT:PBS	C18:neg	Dl-4-hydroxyphenyllactic acid	C9 H10 O4	182.058	1.169	C03672	MReference-312	HMDB0000755	-0.0002	-1.0289		91.7	32	level2	Phenylpropanoids and polyketides	Phenylpropanoic acids	null	Phenylpropanoic acids	NULL	other
1.206_207.002	0.3892	0.505	0.8118	0.7	0.8766	1.7118	SAT:PBS	C18:neg		C6 H9 N O3 S2	207.002	1.206								0	level5						other
1.215_116.0473	0.9145	0.8929	0.9613	1	1	0.4221	SAT:PBS	C18:neg	Levulinic acid	C5 H8 O3	116.047	1.215		MReference-6566	HMDB0000720	0	-0.0665		65.9	16	level2	Organic acids and derivatives	Keto acids and derivatives	Gamma-keto acids and derivatives	Organic acids		other
1.228_136.0342	1.0928	0.3571	0.7626	0.7	0.8766	0.3403	SAT:PBS	C18:neg	969970	C8 H8 S	136.034	1.228		S67150	HMDB0031825	-0.0004	-3.1759			1	level4	Organosulfur compounds	Thioethers	Aryl thioethers	Aryl thioethers		other
1.269_280.0456	1.2528	0.6721	0.8946	1	1	0.4388	SAT:PBS	C18:neg		C9 H13 Cl N2 O6	280.046	1.269						90.2		0	level5						other
1.588_164.0472	2.784	0.0267	0.4046	0.1	0.5784	1.8914	SAT:PBS	C18:neg	3-coumaric acid	C9 H8 O3	164.047	1.588	C12621	MReference-1402	HMDB0001713	-0.0001	-0.8244		91.1	21	level2	Phenylpropanoids and polyketides	Cinnamic acids and derivatives	Hydroxycinnamic acids and derivatives	Polyketides[PK]	map00360 Phenylalanine metabolism; map01100 Metabolic pathways;	up
1.898_205.9882	1.7743	0.258	0.7494	0.2	0.6759	1.1647	SAT:PBS	C18:neg	5-sulfooxymethylfurfural	C6 H6 O6 S	205.988	1.898		S136301	HMDB0059752	-0.0003	-1.4932			3	level4	Organic oxygen compounds	Organooxygen compounds	Carbonyl compounds	Carbonyl compounds		other
10.01_608.4795	0.9453	0.7384	0.8991	1	1	0.1913	SAT:PBS	C18:neg		C40 H64 O4	608.48	10.01								0	level5						other
10.02_304.2395	0.8934	0.4988	0.8064	0.7	0.8766	0.3346	SAT:PBS	C18:neg	Arachidonic acid	C20 H32 O2	304.24	10.02	C00219	MReference-2742	HMDB0001043	-0.0007	-2.3784		86.5	56	level2	Lipids and lipid-like molecules	Fatty Acyls	Fatty acids and conjugates	Fatty acyls[FA]	map00590 Arachidonic acid metabolism; map00591 Linoleic acid metabolism; map01040 Biosynthesis of unsaturated fatty acids; map01100 Metabolic pathways; map04216 Ferroptosis; map04217 Necroptosis; map04270 Vascular smooth muscle contraction; map04611 Platelet activation; map04664 Fc epsilon RI signaling pathway; map04666 Fc gamma R-mediated phagocytosis; map04723 Retrograde endocannabinoid signali…	other
10.02_825.5888	0.8786	0.2665	0.7494	0.2	0.6759	0.3571	SAT:PBS	C18:neg	O-(hydroxy{(2r)-2-[(8z,11z,14z)-8,11,14-icosatrienoyloxy]-3-[(1z)-1-icosen-1-yloxy]propoxy}phosphoryl)-l-serine	C46 H84 N O9 P	825.589	10.02		S113376734		0.0004	0.4714			4	level4						other
10.024_372.2269	1.0935	0.2352	0.7494	0.1	0.5784	0.4668	SAT:PBS	C18:neg		C20 H37 O2 P S	372.227	10.024								0	level5						other
10.024_567.353	0.9587	0.4003	0.769	0.7	0.8766	0.1518	SAT:PBS	C18:neg	O-{[(2r)-3-(henicosanoyloxy)-2-hydroxypropoxy](hydroxy)phosphoryl}-l-serine	C27 H54 N O9 P	567.353	10.024		S113376762		-0.0006	-1.0486			1	level4						other
10.032_560.4799	0.4475	0.0237	0.4046	0.1	0.5784	2.6117	SAT:PBS	C18:neg	(9z,11r,12z,15z)-11-(stearoyloxy)-9,12,15-octadecatrienoic acid	C36 H64 O4	560.48	10.032		S113371105		-0.0005	-0.941			1	level4						down
10.035_584.4796	0.8117	0.303	0.7494	0.4	0.7765	0.665	SAT:PBS	C18:neg		C38 H64 O4	584.48	10.035								0	level5						other
10.055_280.2395	0.675	0.0393	0.459	0.1	0.5784	1.5377	SAT:PBS	C18:neg	Linoleic acid	C18 H32 O2	280.24	10.055	C01595	MReference-2706	HMDB0000673	-0.0008	-2.6812		86.5	123	level2	Lipids and lipid-like molecules	Fatty Acyls	Lineolic acids and derivatives	Fatty acyls[FA]	map00591 Linoleic acid metabolism; map01040 Biosynthesis of unsaturated fatty acids; map01100 Metabolic pathways;	down
10.058_400.2816	0.83	0.4825	0.8006	1	1	0.9213	SAT:PBS	C18:neg	Ascr#27	C22 H40 O6	400.282	10.058		S31150636		-0.0009	-2.2988			2	level4						other
10.066_635.3406	1.0081	0.9862	0.9929	0.7	0.8766	0.046	SAT:PBS	C18:neg	(7r,13e)-1-amino-4,12-dihydroxy-7-{[(9z)-9-octadecenoyloxy]methyl}-9-oxo-3,5,8-trioxa-4-phosphapentadec-13-en-15-oic acid 4-oxide	C30 H54 N O11 P	635.341	10.066		S113380862		-0.0028	-4.4475			1	level4						other
10.068_355.3077	0.9121	0.2908	0.7494	0.4	0.7765	0.3633	SAT:PBS	C18:neg	N-stearoyl-l-alanine	C21 H41 N O3	355.308	10.068		S18997987		-0.0009	-2.6404			3	level4						other
10.07_348.2268	0.8404	0.0251	0.4046	0.1	0.5784	0.9068	SAT:PBS	C18:neg		C18 H37 O2 P S	348.227	10.07								0	level5						other
10.074_316.216	0.4435	0.0211	0.4046	0.1	0.5784	2.3061	SAT:PBS	C18:neg		C18 H33 Cl O2	316.216	10.074								0	level5						down
10.082_369.3234	0.5632	0.375	0.7626	0.4	0.7765	1.1923	SAT:PBS	C18:neg	4-(stearoylamino)butanoic acid	C22 H43 N O3	369.323	10.082		S142829	HMDB0062341	-0.0009	-2.5639			4	level4	Organic acids and derivatives	Carboxylic acids and derivatives	Amino acids, peptides, and analogues	Amino acids, peptides, and analogues		other
10.108_366.2319	0.4239	0.0314	0.4122	0.1	0.5784	2.2509	SAT:PBS	C18:neg	(8r,9s)-fumigaclavine c	C23 H30 N2 O2	366.232	10.108	C20438	S8220005		0.0011	3.0784			1	level4						down
10.13_330.2552	0.7711	0.2285	0.7494	0.4	0.7765	0.9447	SAT:PBS	C18:neg	Docosapentaenoic acid	C22 H34 O2	330.255	10.13		S4942831		-0.0006	-1.9398			23	level4						other
10.142_593.3683	1.0258	0.8473	0.9432	0.7	0.8766	0.162	SAT:PBS	C18:neg	1-o-palmitoyl-2-o-(5-oxovaleryl)-sn-glycero-3-phosphocholine	C29 H56 N O9 P	593.368	10.142		S19160424		-0.001	-1.6564			1	level4						other
10.145_555.3531	1.0935	0.057	0.5814	0.1	0.5784	0.5085	SAT:PBS	C18:neg	O-(hydroxy{(2r)-2-hydroxy-3-[(2-methoxynonadecyl)oxy]propoxy}phosphoryl)-l-serine	C26 H54 N O9 P	555.353	10.145		S113376784		-0.0006	-1.0266			1	level4						other
10.185_527.3572	0.8706	0.0267	0.4046	0.1	0.5784	0.8794	SAT:PBS	C18:neg		C25 H54 N O8 P	527.357	10.185								0	level5						other
10.192_398.2425	0.7169	0.1088	0.6996	0.2	0.6759	1.2404	SAT:PBS	C18:neg	Kj9800000	C18 H39 O7 P	398.243	10.192	C14446	S6292		-0.0009	-2.2468			1	level4					NULL	other
10.213_374.2425	0.8719	0.5508	0.8368	1	1	0.4498	SAT:PBS	C18:neg		C20 H39 O2 P S	374.243	10.213								0	level5						other
10.216_463.3051	0.947	0.9668	0.99	0.7	0.8766	0.0584	SAT:PBS	C18:neg		C23 H46 N O6 P	463.305	10.216								0	level5						other
10.217_343.2538	0.5384	0.1947	0.7494	0.4	0.7765	1.7589	SAT:PBS	C18:neg		C19 H37 N O2 S	343.254	10.217								0	level5						other
10.222_306.2552	0.6302	0.116	0.71	0.1	0.5784	1.3855	SAT:PBS	C18:neg	8z,11z,14z-eicosatrienoic acid	C20 H34 O2	306.255	10.222	C03242	MReference-349	HMDB0002925	-0.0007	-2.2637		89	41	level2	Lipids and lipid-like molecules	Fatty Acyls	Fatty acids and conjugates	Fatty acyls[FA]	map00591 Linoleic acid metabolism; map01040 Biosynthesis of unsaturated fatty acids; map01100 Metabolic pathways;	other
10.251_256.2396	0.7431	0.1408	0.7307	0.1	0.5784	1.1705	SAT:PBS	C18:neg	Palmitic acid	C16 H32 O2	256.24	10.251	C00249	MReference-9949	HMDB0000220	-0.0006	-2.5277		87.8	32	level2	Lipids and lipid-like molecules	Fatty Acyls	Fatty acids and conjugates	Fatty acyls[FA]	map00061 Fatty acid biosynthesis; map00062 Fatty acid elongation; map00071 Fatty acid degradation; map01040 Biosynthesis of unsaturated fatty acids; map01100 Metabolic pathways; map01212 Fatty acid metabolism;	other
10.253_482.319	0.7872	0.2938	0.7494	0.4	0.7765	1.0553	SAT:PBS	C18:neg		C20 H49 N6 O P3	482.319	10.253								0	level5						other
10.263_637.3565	0.8934	0.4592	0.7836	0.7	0.8766	0.405	SAT:PBS	C18:neg		C30 H56 N O11 P	637.356	10.263								0	level5						other
10.272_553.3725	0.7784	0.0131	0.4046	0.1	0.5784	1.2534	SAT:PBS	C18:neg		C27 H56 N O8 P	553.372	10.272								0	level5						down
10.299_356.271	0.6057	0.3473	0.7614	0.4	0.7765	1.3163	SAT:PBS	C18:neg	Ethyl docosahexaenoate	C24 H36 O2	356.271	10.299	C16185	S8007148		-0.0006	-1.6069			11	level4	FA Fatty acyls	FA04 Docosanoids	Null	Fatty acyls[FA]	NULL	other
10.331_402.2972	0.6515	0.4019	0.769	0.4	0.7765	0.8839	SAT:PBS	C18:neg	Ascr#28	C22 H42 O6	402.297	10.331		S31150637		-0.0009	-2.3496			4	level4						other
10.34_350.2426	0.7185	0.1218	0.7166	0.2	0.6759	1.2643	SAT:PBS	C18:neg		C18 H39 O2 P S	350.243	10.34								0	level5						other
10.351_282.2552	0.5797	0.1084	0.6996	0.2	0.6759	1.5727	SAT:PBS	C18:neg	Oleic acid	C18 H34 O2	282.255	10.351	C00712	MReference-10	HMDB0000207	-0.0007	-2.602		77.7	59	level2	Lipids and lipid-like molecules	Fatty Acyls	Fatty acids and conjugates	Fatty acyls[FA]	map00061 Fatty acid biosynthesis; map01040 Biosynthesis of unsaturated fatty acids;	other
10.383_569.3685	1.1031	0.2105	0.7494	0.4	0.7765	0.4575	SAT:PBS	C18:neg	O-(hydroxy{(2r)-2-hydroxy-3-[(2-methoxyicosyl)oxy]propoxy}phosphoryl)-l-serine	C27 H56 N O9 P	569.369	10.383		S113376785		-0.0008	-1.3982			1	level4						other
10.385_332.2708	0.5637	0.066	0.6277	0.1	0.5784	1.5456	SAT:PBS	C18:neg	(7e,10e,13e,16e)-7,10,13,16-docosatetraenoic acid	C22 H36 O2	332.271	10.385		S4445971		-0.0007	-2.189			18	level4						other
10.459_595.3839	1.0576	0.8575	0.9459	0.7	0.8766	0.2781	SAT:PBS	C18:neg		C29 H58 N O9 P	595.384	10.459								0	level5						other
10.534_308.2709	0.6271	0.155	0.7307	0.2	0.6759	1.2423	SAT:PBS	C18:neg	11(z),14(z)-eicosadienoic acid	C20 H36 O2	308.271	10.534	C16525	MReference-6815	HMDB0005060	-0.0006	-1.9755		79.9	38	level2	Lipids and lipid-like molecules	Fatty Acyls	Fatty acids and conjugates	Fatty acyls[FA]	map01040 Biosynthesis of unsaturated fatty acids;	other
10.598_358.2866	0.6892	0.3438	0.7614	0.4	0.7765	1.0409	SAT:PBS	C18:neg	1-phenyl-1,3-octadecanedione	C24 H38 O2	358.287	10.598		S78501	HMDB0035583	-0.0005	-1.4854			16	level4	Organic oxygen compounds	Organooxygen compounds	Carbonyl compounds	Carbonyl compounds		other
10.648_583.384	1.0096	0.9058	0.9659	1	1	0.0521	SAT:PBS	C18:neg	O-(hydroxy{(2r)-2-hydroxy-3-[(2-methoxyhenicosyl)oxy]propoxy}phosphoryl)-l-serine	C28 H58 N O9 P	583.384	10.648		S113376786		-0.001	-1.6299			1	level4						other
10.845_284.2709	0.7059	0.397	0.7665	0.7	0.8766	0.759	SAT:PBS	C18:neg	Stearic acid	C18 H36 O2	284.271	10.845	C01530	MReference-919	HMDB0000827	-0.0006	-2.207		85.7	27	level2	Lipids and lipid-like molecules	Fatty Acyls	Fatty acids and conjugates	Fatty acyls[FA]	map00061 Fatty acid biosynthesis; map01040 Biosynthesis of unsaturated fatty acids;	other
10.85_330.2765	0.6868	0.3976	0.7665	0.7	0.8766	0.7964	SAT:PBS	C18:neg	1728235	C19 H38 O4	330.276	10.85		S14201		-0.0005	-1.5346		82.1	7	level4						other
10.867_352.2584	0.7242	0.0288	0.4046	0.1	0.5784	0.9217	SAT:PBS	C18:neg		C17 H32 N6 O2	352.258	10.867								0	level5						other
10.95_310.2866	0.708	0.1419	0.7307	0.4	0.7765	1.0568	SAT:PBS	C18:neg	11(z)-eicosenoic acid	C20 H38 O2	310.287	10.95	C16526	MReference-9832	HMDB0002231	-0.0006	-1.9561		74.9	43	level2	Lipids and lipid-like molecules	Fatty Acyls	Fatty acids and conjugates	Fatty acyls[FA]	map01040 Biosynthesis of unsaturated fatty acids;	other
10.977_597.3995	0.9499	0.6442	0.8858	0.7	0.8766	0.208	SAT:PBS	C18:neg	O-(hydroxy{(2r)-2-hydroxy-3-[(2-methoxydocosyl)oxy]propoxy}phosphoryl)-l-serine	C29 H60 N O9 P	597.399	10.977		S113376787		-0.0011	-1.7591			1	level4						other
2.437_191.0613	0.9438	0.7142	0.8946	1	1	0.1777	SAT:PBS	C18:neg	N-acetyl-l-methionine	C7 H13 N O3 S	191.061	2.437	C02712	MReference-1377	HMDB0011745	-0.0003	-1.7527		46.9	2	level3	Organic acids and derivatives	Carboxylic acids and derivatives	Amino acids, peptides, and analogues	Amino acids, peptides, and analogues	NULL	other
2.511_165.0788	1.4339	0.1971	0.7494	0.2	0.6759	1.3083	SAT:PBS	C18:neg	L-phenylalanine	C9 H11 N O2	165.079	2.511	C02057	BGI374		-0.0001	-0.7672	97.6	94.9	17	level1					NULL	other
2.517_189.9933	1.0814	0.8769	0.9518	1	1	0.1904	SAT:PBS	C18:neg	Mfcd12546417	C6 H6 O5 S	189.993	2.517	C06674	S164229		-0.0003	-1.5882			4	level4						other
2.53_110.0368	1.1621	1	1	0.7	0.8766	0.0539	SAT:PBS	C18:neg	Hydroquinone	C6 H6 O2	110.037	2.53	C00530	BGI314	HMDB0002434	0	-0.2156	86.9	84.9	7	level2	Benzenoids	Phenols	Benzenediols	Phenols and derivatives	map00350 Tyrosine metabolism; map01100 Metabolic pathways;	other
2.533_116.0281	0.9476	0.7247	0.8946	1	1	0.9388	SAT:PBS	C18:neg			116.028	2.533								0	level5						other
2.555_157.0737	0.6601	0.4139	0.769	0.7	0.8766	1.0611	SAT:PBS	C18:neg	3-methylcrotonylglycine	C7 H11 N O3	157.074	2.555	C20828	MReference-210	HMDB0000459	-0.0002	-1.242		82.5	6	level2	Organic acids and derivatives	Carboxylic acids and derivatives	Amino acids, peptides, and analogues	Amino acids, peptides, and analogues	NULL	other
2.593_278.0664	1.149	0.6959	0.8946	1	1	0.4705	SAT:PBS	C18:neg	1-(2-deoxy-5-o-phosphono-beta-d-erythro-pentofuranosyl)-1,2-dihydropyrimidine	C9 H15 N2 O6 P	278.066	2.593		S390164		-0.0004	-1.2929			1	level4						other
2.798_242.0897	0.8746	0.3732	0.7626	0.7	0.8766	0.5731	SAT:PBS	C18:neg	Thymidine	C10 H14 N2 O5	242.09	2.798	C00214	MReference-1230	HMDB0000273	-0.0006	-2.2859		91.4	3	level1	Nucleosides, nucleotides, and analogues	Pyrimidine nucleosides	Pyrimidine 2'-deoxyribonucleosides	Nucleic acids and analogues	map00240 Pyrimidine metabolism; map01100 Metabolic pathways;	other
2.8_288.0952	1.0048	0.8908	0.961	0.7	0.8766	0.0854	SAT:PBS	C18:neg	Iprobenfos	C13 H21 O3 P S	288.095	2.8	C15230	S30753	HMDB0031768	0.0003	0.9079			1	level4	Benzenoids	Benzene and substituted derivatives	null	Benzene and derivatives	NULL	other
2.82_416.0883	0.815	0.2456	0.7494	0.2	0.6759	0.576	SAT:PBS	C18:neg	3,5-dihydroxy-2-(4-hydroxyphenyl)-10-phenyl-9,10-dihydro-4h,8h-pyrano[2,3-f]chromene-4,8-dione	C24 H16 O7	416.088	2.82		S24844723		-0.0013	-3.0765			1	level4						other
2.873_133.056	1.4897	0.1687	0.7416	0.2	0.6759	1.2732	SAT:PBS	C18:neg	(1e)-n-hydroxy-4-(methylsulfanyl)-1-butanimine	C5 H11 N O S	133.056	2.873	C17241	S24784893		-0.0001	-0.7122			1	level4					map01210 2-Oxocarboxylic acid metabolism;	other
2.873_181.0228	1.2673	0.0798	0.6739	0.2	0.6759	0.9134	SAT:PBS	C18:neg		C5 H11 N O2 S2	181.023	2.873								0	level5						other
2.934_258.9756	0.8852	0.6859	0.8946	0.7	0.8766	0.4085	SAT:PBS	C18:neg		C5 H12 N O3 P3 S	258.976	2.934								0	level5						other
2.945_369.9788	0.7388	0.533	0.8193	0.7	0.8766	0.4427	SAT:PBS	C18:neg		C8 H11 N4 O7 P S2	369.979	2.945								0	level5						other
2.948_173.9984	0.8697	0.2317	0.7494	0.4	0.7765	0.4504	SAT:PBS	C18:neg	4-phenolsulfonic acid	C6 H6 O4 S	173.998	2.948	C12849	S4601		-0.0003	-1.5225			2	level4					NULL	other
2.957_138.0316	1.1423	0.9042	0.9659	0.7	0.8766	0.1209	SAT:PBS	C18:neg	Salicylic acid	C7 H6 O3	138.032	2.957	C00805	S331	HMDB0001895	-0.0001	-0.3959			10	level4	Benzenoids	Benzene and substituted derivatives	Benzoic acids and derivatives	Benzene and derivatives	map00360 Phenylalanine metabolism; map01100 Metabolic pathways; map04976 Bile secretion;	other
2.957_94.0418	1.0459	0.7579	0.9076	1	1	0.2105	SAT:PBS	C18:neg	Phenol	C6 H6 O	94.0418	2.957	C00146	MReference-3052	HMDB0000228	0	-0.2432		87.8	2	level2	Benzenoids	Phenols	1-hydroxy-4-unsubstituted benzenoids	Phenols and derivatives	map00350 Tyrosine metabolism; map01100 Metabolic pathways; map04974 Protein digestion and absorption;	other
2.958_501.1293	0.8954	0.5255	0.8167	0.7	0.8766	1.0138	SAT:PBS	C18:neg		C21 H27 N O11 S	501.129	2.958								0	level5						other
2.965_179.058	0.8761	0.6014	0.8541	0.7	0.8766	0.5474	SAT:PBS	C18:neg	Hippurate	C9 H9 N O3	179.058	2.965	C01586	BGI309	HMDB0000714	-0.0002	-1.1779	97.2	91.1	8	level1	Benzenoids	Benzene and substituted derivatives	Benzoic acids and derivatives	Benzene and derivatives	map00360 Phenylalanine metabolism; map01100 Metabolic pathways;	other
2.965_327.1313	1.1979	0.9843	0.9929	1	1	0.3942	SAT:PBS	C18:neg	(2s)-3-phenyl-2-({[(3s,4s,5r)-2,3,4-trihydroxy-5-(hydroxymethyl)tetrahydro-2-furanyl]methyl}amino)propanoic acid (non-preferred name)	C15 H21 N O7	327.131	2.965		S35014483	HMDB0037846	-0.0005	-1.5027			1	level4	Organic acids and derivatives	Carboxylic acids and derivatives	Amino acids, peptides, and analogues	Amino acids, peptides, and analogues		other
2.974_135.0684	0.7344	0.418	0.7698	0.7	0.8766	1.0082	SAT:PBS	C18:neg	Acetanilide	C8 H9 N O	135.068	2.974	C07565	S880	HMDB0001250	-0.0001	-0.5096			14	level4	Benzenoids	Benzene and substituted derivatives	null	Benzene and derivatives	NULL	other
2.994_152.0471	0.807	0.3042	0.7494	0.4	0.7765	0.85	SAT:PBS	C18:neg	2-hydroxyphenylacetic acid	C8 H8 O3	152.047	2.994	C05852	MReference-141	HMDB0000669	-0.0002	-1.2909	44	92.6	37	level2	Benzenoids	Benzene and substituted derivatives	Phenylacetic acids	Benzene and derivatives	map00360 Phenylalanine metabolism; map01100 Metabolic pathways;	other
3.005_183.053	1.2813	0.6226	0.871	1	1	0.6233	SAT:PBS	C18:neg	4-pyridoxic acid	C8 H9 N O4	183.053	3.005	C00847	MReference-1	HMDB0000017	-0.0002	-0.9931		94.3	5	level2	Organoheterocyclic compounds	Pyridines and derivatives	Pyridinecarboxylic acids and derivatives	Pyridine and derivatives	map00750 Vitamin B6 metabolism; map01100 Metabolic pathways;	other
3.047_165.0424	0.9898	0.8789	0.9518	1	1	0.1374	SAT:PBS	C18:neg	Am9627000	C8 H7 N O3	165.042	3.047	C02803	S21106581		-0.0002	-1.1292			8	level4					NULL	other
3.047_166.0628	1.1599	0.2559	0.7494	0.2	0.6759	0.4866	SAT:PBS	C18:neg	3-phenyllactic acid	C9 H10 O3	166.063	3.047	C05607	MReference-311	HMDB0000748	-0.0002	-0.9041	65.6	92	44	level2	Phenylpropanoids and polyketides	Phenylpropanoic acids	null	Phenylpropanoic acids	map00360 Phenylalanine metabolism; map01100 Metabolic pathways;	other
3.055_413.2104	1.2869	0.0843	0.6739	0.1	0.5784	0.8374	SAT:PBS	C18:neg	Delanzomib	C21 H28 B N3 O5	413.21	3.055		S23325665		-0.0018	-4.3415			1	level4						other
3.066_116.0281	1.9943	0.0969	0.6969	0.1	0.5784	2.1602	SAT:PBS	C18:neg			116.028	3.066								0	level5						other
3.071_213.0092	0.9834	0.8047	0.9251	1	1	0.4009	SAT:PBS	C18:neg	3-indoxyl sulphate	C8 H7 N O4 S	213.009	3.071		MReference-1303	HMDB0000682	-0.0004	-1.8272		95.9	1	level2	Organic acids and derivatives	Organic sulfuric acids and derivatives	Arylsulfates	Organic acids		other
3.073_223.0333	0.8051	0.4581	0.7836	0.4	0.7765	0.5747	SAT:PBS	C18:neg	Bucillamine	C7 H13 N O3 S2	223.033	3.073		S570965		-0.0004	-1.6862			1	level4						other
3.08_117.0578	1.176	0.3189	0.7494	0.7	0.8766	0.5852	SAT:PBS	C18:neg	Indole	C8 H7 N	117.058	3.08	C00463	S776	HMDB0000738	0	-0.0961			2	level4	Organoheterocyclic compounds	Indoles and derivatives	Indoles	Indoles	map00380 Tryptophan metabolism; map00400 Phenylalanine, tyrosine and tryptophan biosynthesis; map01100 Metabolic pathways; map04974 Protein digestion and absorption;	other
3.08_204.0896	1.3008	0.2128	0.7494	0.4	0.7765	1.1068	SAT:PBS	C18:neg	L-tryptophan	C11 H12 N2 O2	204.09	3.08	C00078	BGI382	HMDB0000929	-0.0003	-1.5557	97.2	94.6	12	level1	Peptides	Amino acids	Common amino acids [Fig]	Amino acids	map00260 Glycine, serine and threonine metabolism; map00380 Tryptophan metabolism; map00400 Phenylalanine, tyrosine and tryptophan biosynthesis; map00970 Aminoacyl-tRNA biosynthesis; map01100 Metabolic pathways; map01210 2-Oxocarboxylic acid metabolism; map01230 Biosynthesis of amino acids; map04726 Serotonergic synapse; map04974 Protein digestion and absorption; map04978 Mineral absorption; map0…	other
3.092_297.9865	1.0608	0.8944	0.9613	0.7	0.8766	0.3616	SAT:PBS	C18:neg		C7 H13 N2 O3 P3 S	297.986	3.092								0	level5						other
3.111_448.0003	0.6665	0.911	0.9659	1	1	0.4035	SAT:PBS	C18:neg		C15 H19 N2 O4 P3 S2	448	3.111								0	level5						other
3.118_579.1516	0.6483	0.4403	0.7785	0.7	0.8766	1.3068	SAT:PBS	C18:neg		C27 H36 N O5 P3 S	579.152	3.118								0	level5						other
3.151_217.131	0.9494	0.963	0.99	0.7	0.8766	0.1897	SAT:PBS	C18:neg	Propionylcarnitine	C10 H19 N O4	217.131	3.151	C03017	S96904		-0.0004	-1.8871			3	level4	FA Fatty acyls	FA07 Fatty esters	FA0707 Fatty acyl carnitines	Fatty acyls[FA]	NULL	other
3.238_205.0736	0.8846	0.3537	0.7626	0.4	0.7765	0.4998	SAT:PBS	C18:neg	Indole-3-lactic acid	C11 H11 N O3	205.074	3.238	C02043	MReference-450	HMDB0000671	-0.0003	-1.4293		91.5	8	level2	Organoheterocyclic compounds	Indoles and derivatives	Indolyl carboxylic acids and derivatives	Indole and derivatives		other
3.272_366.1422	0.9608	0.5956	0.8541	0.7	0.8766	0.8426	SAT:PBS	C18:neg	2-iodohexadecanal	C16 H31 I O	366.142	3.272		S2299788		0.0003	0.739			1	level4						other
3.286_232.0037	1.9566	0.2188	0.7494	0.2	0.6759	1.0279	SAT:PBS	C18:neg	4-formyl-2-methoxyphenyl hydrogen sulfate	C8 H8 O6 S	232.004	3.286		S10798458	HMDB0041789	-0.0005	-2.0583			5	level4	Organic acids and derivatives	Organic sulfuric acids and derivatives	Arylsulfates	Organic acids		other
3.373_220.0037	0.7835	0.9653	0.99	1	1	0.1269	SAT:PBS	C18:neg		C7 H8 O6 S	220.004	3.373								0	level5						other
3.403_193.0737	1.1027	0.7684	0.9095	1	1	0.6776	SAT:PBS	C18:neg	Phenylacetylglycine	C10 H11 N O3	193.074	3.403	C05598	MReference-540	HMDB0000821	-0.0002	-1.002		91.1	15	level2	Organic acids and derivatives	Carboxylic acids and derivatives	Amino acids, peptides, and analogues	Amino acids, peptides, and analogues	map00360 Phenylalanine metabolism;	other
3.444_248.0349	0.4782	0.2292	0.7494	0.2	0.6759	1.4225	SAT:PBS	C18:neg	4-ethyl-2-hydroxy-6-methoxyphenyl hydrogen sulfate	C9 H12 O6 S	248.035	3.444		S74852093	HMDB0128019	-0.0005	-2.1356			1	level4	Organic acids and derivatives	Organic sulfuric acids and derivatives	Arylsulfates	Organic acids		other
3.453_394.0433	1.0457	0.7569	0.9076	1	1	0.3779	SAT:PBS	C18:neg		C12 H18 N4 O5 S3	394.043	3.453								0	level5						other
3.507_284.0891	2.3947	0.2495	0.7494	0.2	0.6759	2.8284	SAT:PBS	C18:neg	Mfcd08277028	C13 H16 O7	284.089	3.507		S135751	HMDB0011686	-0.0005	-1.8834			2	level4	Organic oxygen compounds	Organooxygen compounds	Carbohydrates and carbohydrate conjugates	Carbohydrates		other
3.542_164.0472	1.5063	0.1602	0.7307	0.2	0.6759	1.5915	SAT:PBS	C18:neg	Phenylpyruvic acid	C9 H8 O3	164.047	3.542	C00166	MReference-1389	HMDB0000205	-0.0001	-0.9032		82.4	21	level2	Benzenoids	Benzene and substituted derivatives	Phenylpyruvic acid derivatives	Benzene and derivatives	map00360 Phenylalanine metabolism; map00400 Phenylalanine, tyrosine and tryptophan biosynthesis; map01100 Metabolic pathways; map01210 2-Oxocarboxylic acid metabolism; map01230 Biosynthesis of amino acids;	other
3.552_154.0265	1.743	0.2425	0.7494	0.7	0.8766	1.6375	SAT:PBS	C18:neg	2,4-dihydroxybenzoic acid	C7 H6 O4	154.026	3.552		MReference-156	HMDB0029666	-0.0001	-0.7757	79.5	86	8	level2	Benzenoids	Benzene and substituted derivatives	Benzoic acids and derivatives	Benzene and derivatives		other
3.562_110.0368	0.9591	0.7196	0.8946	1	1	0.091	SAT:PBS	C18:neg	Resorcinol	C6 H6 O2	110.037	3.562	C01751	MReference-2793	HMDB0032037	0	-0.1321	43.6	83.8	7	level2	Benzenoids	Phenols	Benzenediols	Phenols and derivatives		other
3.711_203.058	0.9331	0.9372	0.981	0.7	0.8766	0.0751	SAT:PBS	C18:neg	Indole-3-pyruvic acid	C11 H9 N O3	203.058	3.711	C00331	MReference-448	HMDB0060484	-0.0002	-1.1138		78.8	2	level2	Organoheterocyclic compounds	Indoles and derivatives	Indolyl carboxylic acids and derivatives	Indole and derivatives	map00380 Tryptophan metabolism; map01100 Metabolic pathways;	other
3.787_204.009	0.7249	0.4869	0.8006	0.4	0.7765	0.9045	SAT:PBS	C18:neg	Guaiacol sulfate	C7 H8 O5 S	204.009	3.787		S21078	HMDB0060013	-0.0002	-1.0469			1	level4	Organic acids and derivatives	Organic sulfuric acids and derivatives	Arylsulfates	Organic acids		other
3.796_207.0892	0.9856	0.9717	0.9911	1	1	0.0934	SAT:PBS	C18:neg	N-acetyl-l-phenylalanine	C11 H13 N O3	207.089	3.796	C03519	BGI422	HMDB0000512	-0.0003	-1.4598	97.1	93.1	10	level2	Organic acids and derivatives	Carboxylic acids and derivatives	Amino acids, peptides, and analogues	Amino acids, peptides, and analogues	map00360 Phenylalanine metabolism; map01100 Metabolic pathways;	other
3.82_296.1367	0.9003	0.3233	0.7494	0.4	0.7765	0.2339	SAT:PBS	C18:neg		C8 H21 N6 O4 P	296.137	3.82								0	level5						other
3.84_228.9898	2.1634	0.1344	0.7307	0.4	0.7765	1.9149	SAT:PBS	C18:neg		C5 H11 N O3 S3	228.99	3.84								0	level5						other
3.875_203.1155	1.222	0.5329	0.8193	0.4	0.7765	0.6647	SAT:PBS	C18:neg	Acetylcarnitine	C9 H17 N O4	203.115	3.875		S21243783		-0.0003	-1.35			4	level4						other
3.889_246.1	0.9284	0.8244	0.9325	1	1	0.3589	SAT:PBS	C18:neg	N-acetyl-dl-tryptophan	C13 H14 N2 O3	246.1	3.889		MReference-814		-0.0005	-2.0041	78.6	88.7	6	level2						other
3.92_183.0893	1.3285	0.9808	0.9929	0.7	0.8766	0.159	SAT:PBS	C18:neg	Epinephrine	C9 H13 N O3	183.089	3.92	C00788	MReference-310	HMDB0000068	-0.0003	-1.4431		62.2	8	level2	Benzenoids	Phenols	Benzenediols	Phenols and derivatives	map00350 Tyrosine metabolism; map01100 Metabolic pathways; map04024 cAMP signaling pathway; map04080 Neuroactive ligand-receptor interaction; map04261 Adrenergic signaling in cardiomyocytes; map04923 Regulation of lipolysis in adipocytes; map04924 Renin secretion;	other
4.006_122.0368	1.2916	0.1537	0.7307	0.2	0.6759	1.2093	SAT:PBS	C18:neg	4-hydroxybenzaldehyde	C7 H6 O2	122.037	4.006	C00633	MReference-234	HMDB0011718	0	0.0647		84.4	6	level1	Organic oxygen compounds	Organooxygen compounds	Carbonyl compounds	Carbonyl compounds	map01100 Metabolic pathways;	other
4.048_172.1098	0.2506	0.1064	0.6996	0.1	0.5784	2.5155	SAT:PBS	C18:neg	Oi1695000	C9 H16 O3	172.11	4.048		S15496	HMDB0040165	-0.0001	-0.7931			25	level4	Organic acids and derivatives	Keto acids and derivatives	Gamma-keto acids and derivatives	Organic acids		other
4.061_271.1414	0.3872	0.0005	0.1364	0.1	0.5784	2.2446	SAT:PBS	C18:neg	3-{4-[(2s)-2-amino-2-carboxyethyl]-1h-imidazol-2-yl}-1-carboxy-n-methyl-1-propanaminium	C11 H19 N4 O4	271.141	4.061		S389379	HMDB0011654	0.0007	2.7317			1	level4	Organic acids and derivatives	Carboxylic acids and derivatives	Amino acids, peptides, and analogues	Amino acids, peptides, and analogues		down
4.064_214.1201	0.4299	0.036	0.4388	0.1	0.5784	1.6875	SAT:PBS	C18:neg	5-hexyl-2-oxotetrahydro-3-furancarboxylic acid	C11 H18 O4	214.12	4.064		S8551389	HMDB0030984	-0.0004	-1.7767			4	level4	Organoheterocyclic compounds	Lactones	Gamma butyrolactones	Gamma butyrolactones		down
4.066_176.1046	1.1121	0.5129	0.8152	0.7	0.8766	0.3169	SAT:PBS	C18:neg	Ethanal tetramer	C8 H16 O4	176.105	4.066	C18744	S54981		-0.0003	-1.6143			4	level4					NULL	other
4.088_260.1188	0.6529	0.0478	0.5081	0.1	0.5784	1.4585	SAT:PBS	C18:neg		C11 H20 N2 O3 S	260.119	4.088								0	level5						down
4.093_185.105	1.2013	0.9577	0.9894	0.7	0.8766	0.0947	SAT:PBS	C18:neg	Otonecine	C9 H15 N O3	185.105	4.093	C10356	S4445054		-0.0002	-1.1829			9	level4	Alkaloids	Alkaloids derived from ornithine	Pyrrolizidine alkaloids	Alkaloids	NULL	other
4.121_146.0942	1.0175	0.6831	0.8946	0.7	0.8766	0.1398	SAT:PBS	C18:neg	N-butyl lactate	C7 H14 O3	146.094	4.121		S8409	HMDB0040254	-0.0001	-0.4442			13	level4	Organic acids and derivatives	Carboxylic acids and derivatives	Carboxylic acid derivatives	Organic acids		other
4.157_294.0227	0.619	0.3669	0.7626	0.4	0.7765	1.2476	SAT:PBS	C18:neg	Monohydroxymethoxychlor olefin	C15 H12 Cl2 O2	294.023	4.157	C14237	S137912		0.0012	4.158			1	level4					NULL	other
4.161_237.0995	1.7317	0.1516	0.7307	0.1	0.5784	1.5781	SAT:PBS	C18:neg	Ethopabate	C12 H15 N O4	237.1	4.161		S5812		-0.0006	-2.3501			6	level4						other
4.162_108.0575	2.1082	0.3075	0.7494	0.4	0.7765	2.5292	SAT:PBS	C18:neg	4-methylphenol	C7 H8 O	108.058	4.162	C01468	MReference-3199	HMDB0001858	0	-0.1908		82.9	5	level2	Benzenoids	Phenols	Cresols	Phenols and derivatives	map01100 Metabolic pathways; map04974 Protein digestion and absorption;	other
4.162_188.014	2.1188	0.2958	0.7494	0.4	0.7765	2.54	SAT:PBS	C18:neg	P-cresylsulfate	C7 H8 O4 S	188.014	4.162		S3806481	HMDB0011635	-0.0003	-1.5593			3	level4	Organic acids and derivatives	Organic sulfuric acids and derivatives	Arylsulfates	Organic acids		other
4.163_398.01	3.0126	0.3153	0.7494	0.4	0.7765	3.5007	SAT:PBS	C18:neg		C12 H10 N6 O6 S2	398.01	4.163								0	level5						other
4.163_420.0651	3.2313	0.2585	0.7494	0.4	0.7765	2.8296	SAT:PBS	C18:neg		C15 H20 N2 O8 S2	420.065	4.163								0	level5						other
4.165_272.9912	1.3691	0.4479	0.7805	1	1	1.7895	SAT:PBS	C18:neg		C6 H13 Cl N3 O P S2	272.991	4.165								0	level5						other
4.194_147.032	0.8624	0.7837	0.9163	0.7	0.8766	0.3604	SAT:PBS	C18:neg	Isatin	C8 H5 N O2	147.032	4.194	C11129	S6787	HMDB0061933	0	-0.3247			3	level4	Organoheterocyclic compounds	Indoles and derivatives	Indolines	Indole and derivatives	NULL	other
4.206_255.0196	0.5179	0.3005	0.7494	0.7	0.8766	0.955	SAT:PBS	C18:neg		C10 H9 N O5 S	255.02	4.206								0	level5						other
4.228_254.0243	0.728	0.3353	0.7614	0.7	0.8766	1.1352	SAT:PBS	C18:neg		C11 H10 O5 S	254.024	4.228								0	level5						other
4.233_173.1051	0.5294	0.0067	0.4046	0.1	0.5784	1.4005	SAT:PBS	C18:neg	Hexanoylglycine	C8 H15 N O3	173.105	4.233		MReference-1299	HMDB0000701	-0.0001	-0.7537		89.5	8	level2	Organic acids and derivatives	Carboxylic acids and derivatives	Amino acids, peptides, and analogues	Amino acids, peptides, and analogues		down
4.279_405.1993	0.7824	0.3041	0.7494	0.7	0.8766	0.6086	SAT:PBS	C18:neg		C12 H32 N5 O8 P	405.199	4.279								0	level5						other
4.319_169.9965	1.0313	0.7006	0.8946	0.7	0.8766	0.1285	SAT:PBS	C18:neg	Heptafluoropropane	C3 H F7	169.996	4.319		S61257		-0.0001	-0.764			1	level4						other
4.319_213.9862	1.0586	0.4037	0.769	0.7	0.8766	0.2508	SAT:PBS	C18:neg	Benzothiazole-2-sulfonamide	C7 H6 N2 O2 S2	213.986	4.319	C14181	S61261		-0.0008	-3.9532			1	level4					NULL	other
4.343_150.0679	0.951	0.7655	0.9087	1	1	0.3728	SAT:PBS	C18:neg	3,4-dimethylbenzoic acid	C9 H10 O2	150.068	4.343		MReference-2597	HMDB0002237	-0.0001	-0.9002		52.1	35	level3	Benzenoids	Benzene and substituted derivatives	Benzoic acids and derivatives	Benzene and derivatives		other
4.352_235.9809	0.6555	0.3624	0.7626	0.4	0.7765	0.8586	SAT:PBS	C18:neg		C7 H8 O5 S2	235.981	4.352								0	level5						other
4.359_187.0631	0.7176	0.3884	0.7653	0.7	0.8766	1.3127	SAT:PBS	C18:neg	Indole-3-acrylic acid	C11 H9 N O2	187.063	4.359		MReference-449		-0.0002	-1.2809		84.9	1	level2						other
4.378_189.0788	0.6815	0.3107	0.7494	0.2	0.6759	1.1199	SAT:PBS	C18:neg	Methyl indole-3-acetate	C11 H11 N O2	189.079	4.378	C20635	MReference-489	HMDB0029738	-0.0002	-1.2095		50.9	6	level3	Organoheterocyclic compounds	Indoles and derivatives	Indolyl carboxylic acids and derivatives	Indole and derivatives	NULL	other
4.418_238.1312	1.2826	0.3143	0.7494	0.4	0.7765	0.4954	SAT:PBS	C18:neg	Seconal	C12 H18 N2 O3	238.131	4.418		S5005	HMDB0014562	-0.0005	-2.2246			2	level4	Organoheterocyclic compounds	Diazines	Pyrimidines and pyrimidine derivatives	Pyrimidines and pyrimidine derivatives		other
4.49_241.1309	1.0887	0.3131	0.7494	0.4	0.7765	0.4179	SAT:PBS	C18:neg	Mfcd08277025	C12 H19 N O4	241.131	4.49	C11841	S112971		-0.0005	-1.9204			1	level4	FA Fatty acyls	FA08 Fatty amides	FA0803 Fatty acyl homoserine lactones	Fatty acyls[FA]		other
4.496_405.1993	0.7987	0.3748	0.7626	0.4	0.7765	0.5792	SAT:PBS	C18:neg		C18 H31 N O9	405.199	4.496								0	level5						other
4.499_292.0975	0.9914	0.8609	0.9459	1	1	0.0291	SAT:PBS	C18:neg	6-chloro-12-methyl-2-oxa-12,15-diazatetracyclo[7.5.3.0~1,10~.0~3,8~]heptadeca-3,5,7-trien-16-one	C15 H17 Cl N2 O2	292.098	4.499		S2315437		-0.0003	-1.1582			1	level4						other
4.534_161.0839	0.6045	0.342	0.7614	0.4	0.7765	1.0193	SAT:PBS	C18:neg	3-(2-hydroxyethyl)indole	C10 H11 N O	161.084	4.534	C00955	MReference-182	HMDB0003447	-0.0002	-1.034		67.9	6	level2	Organoheterocyclic compounds	Indoles and derivatives	Indoles	Indoles	map00380 Tryptophan metabolism;	other
4.534_205.0736	0.6586	0.3551	0.7626	0.4	0.7765	0.7568	SAT:PBS	C18:neg	Cinnamoylglycine	C11 H11 N O3	205.074	4.534		MReference-345	HMDB0011621	-0.0003	-1.5636		90.1	8	level2	Organic acids and derivatives	Carboxylic acids and derivatives	Amino acids, peptides, and analogues	Amino acids, peptides, and analogues		other
4.574_298.1048	0.678	0.3888	0.7653	0.4	0.7765	1.0388	SAT:PBS	C18:neg	90049	C14 H18 O7	298.105	4.574	C10720	S83169		-0.0005	-1.6062			2	level4					NULL	other
4.663_262.0505	0.7545	0.2995	0.7494	0.4	0.7765	0.8113	SAT:PBS	C18:neg	Clonixin	C13 H11 Cl N2 O2	262.05	4.663		S26711		-0.0004	-1.4167		33.3	1	level4						other
4.663_340.0611	0.4398	0.3226	0.7494	0.4	0.7765	1.7889	SAT:PBS	C18:neg	2-hydroxy-4-[2-(2-hydroxyphenyl)ethyl]-6-methoxyphenyl hydrogen sulfate	C15 H16 O7 S	340.061	4.663		S74853951	HMDB0135767	-0.0005	-1.568			9	level4	Phenylpropanoids and polyketides	Stilbenes	null	Polyketides[PK]		other
4.667_207.9593	1.4418	0.1457	0.7307	0.4	0.7765	1.5439	SAT:PBS	C18:neg		C6 H5 Cl O4 S	207.959	4.667								0	level5						other
4.703_418.1258	0.4934	0.2861	0.7494	0.4	0.7765	1.121	SAT:PBS	C18:neg	Aloin a	C21 H22 O9	418.126	4.703	C10305	S24534069		-0.0006	-1.4843			41	level4	Polyketides	Anthraquinones	Anthrone type	Quinone	NULL	other
4.738_336.0299	2.8047	0.7926	0.9206	1	1	0.8369	SAT:PBS	C18:neg		C7 H18 N2 O7 P2 S	336.03	4.738								0	level5						other
4.786_260.9616	1.4305	0.1705	0.7416	0.1	0.5784	1.1464	SAT:PBS	C18:neg		C5 H11 N O3 S4	260.962	4.786								0	level5						other
4.791_175.0631	0.8039	0.6475	0.8859	1	1	0.4333	SAT:PBS	C18:neg	Indole-3-acetic acid	C10 H9 N O2	175.063	4.791	C00954	MReference-445	HMDB0000197	-0.0003	-1.6053	62.7	70	10	level2	Organoheterocyclic compounds	Indoles and derivatives	Indolyl carboxylic acids and derivatives	Indole and derivatives	map00380 Tryptophan metabolism; map01100 Metabolic pathways;	other
4.812_292.0069	0.6848	0.4423	0.7785	0.7	0.8766	1.0983	SAT:PBS	C18:neg		C10 H12 O6 S2	292.007	4.812								0	level5						other
4.814_149.0332	1.7538	0.2309	0.7494	0.4	0.7765	1.4948	SAT:PBS	C18:neg	Ditiocarb	C5 H11 N S2	149.033	4.814	C19150	S8639		-0.0001	-0.4328			3	level4					NULL	other
4.847_218.0245	0.6524	0.3028	0.7494	0.4	0.7765	1.5676	SAT:PBS	C18:neg	4-(2-hydroxyethyl)phenyl hydrogen sulfate	C8 H10 O5 S	218.024	4.847		S30777652	HMDB0041785	-0.0003	-1.6053			2	level4	Organic acids and derivatives	Organic sulfuric acids and derivatives	Arylsulfates	Organic acids		other
4.858_274.1346	1.0192	0.8696	0.951	1	1	0.0788	SAT:PBS	C18:neg	[similar to: ferulic acid; δmass: 80.0766 da]		274.135	4.858								0	level5						other
4.881_274.0141	0.7635	0.5112	0.8152	0.7	0.8766	0.4758	SAT:PBS	C18:neg	Ferulic acid 4-sulfate	C10 H10 O7 S	274.014	4.881		S4878542	HMDB0029200	-0.0006	-2.1113			4	level4	Phenylpropanoids and polyketides	Cinnamic acids and derivatives	Hydroxycinnamic acids and derivatives	Polyketides[PK]		other
4.901_334.0142	2.4695	0.0001	0.0489	0.1	0.5784	1.2537	SAT:PBS	C18:neg	4-[(z)-(6-hydroxy-3-oxo-1-benzofuran-2(3h)-ylidene)methyl]phenyl hydrogen sulfate	C15 H10 O7 S	334.014	4.901		S74854079	HMDB0137537	-0.0005	-1.5884			3	level4	Phenylpropanoids and polyketides	Aurone flavonoids	null	Flavonoids		up
4.92_139.0269	1.0094	0.8778	0.9518	1	1	0.1161	SAT:PBS	C18:neg	6-hydroxynicotinic acid	C6 H5 N O3	139.027	4.92	C01020	MReference-172	HMDB0002658	-0.0001	-0.3628		84	6	level2	Organoheterocyclic compounds	Pyridines and derivatives	Pyridinecarboxylic acids and derivatives	Pyridine and derivatives	map00760 Nicotinate and nicotinamide metabolism; map01100 Metabolic pathways;	other
4.934_246.0193	0.6121	0.3964	0.7665	0.7	0.8766	1.4207	SAT:PBS	C18:neg	3-(sulfooxy)benzenepropanoic acid	C9 H10 O6 S	246.019	4.934		S162993	HMDB0094710	-0.0005	-2.022			10	level4	Organic acids and derivatives	Organic sulfuric acids and derivatives	Arylsulfates	Organic acids		other
4.942_258.0194	1.8251	0.1	0.6996	0.1	0.5784	1.103	SAT:PBS	C18:neg	Methyl (2e)-3-[4-(sulfooxy)phenyl]acrylate	C10 H10 O6 S	258.019	4.942		S28553210	HMDB0131180	-0.0004	-1.7325			5	level4	Phenylpropanoids and polyketides	Cinnamic acids and derivatives	Cinnamic acid esters	Polyketides[PK]		other
4.983_288.0299	1.4563	0.2325	0.7494	0.4	0.7765	0.7388	SAT:PBS	C18:neg	2-hydroxy-5-[(5-oxotetrahydro-2-furanyl)methyl]phenyl hydrogen sulfate	C11 H12 O7 S	288.03	4.983		S35032834	HMDB0029191	-0.0005	-1.7832			6	level4	Organic acids and derivatives	Organic sulfuric acids and derivatives	Arylsulfates	Organic acids		other
4.995_364.0248	1.0926	0.5988	0.8541	0.7	0.8766	0.4498	SAT:PBS	C18:neg	Thioinosinic acid	C10 H13 N4 O7 P S	364.025	4.995	C04646	S2298861	HMDB0060416	0.0006	1.5287			2	level4	Nucleosides, nucleotides, and analogues	Purine nucleotides	Purine ribonucleotides	Purines and derivatives	map00983 Drug metabolism - other enzymes;	other
4.998_338.0455	0.8279	0.7167	0.8946	1	1	0.3058	SAT:PBS	C18:neg	2-(3,4-dihydroxyphenyl)-3,7-dihydroxy-5-chromanesulfinic acid	C15 H14 O7 S	338.046	4.998		S74852018	HMDB0127795	-0.0005	-1.418			15	level4	Phenylpropanoids and polyketides	Flavonoids	Flavans	Flavonoids		other
5.041_352.0248	1.6932	0.1941	0.7494	0.2	0.6759	0.8874	SAT:PBS	C18:neg	4-[(2s)-5,7-dihydroxy-4-oxo-3,4-dihydro-2h-chromen-2-yl]phenyl hydrogen sulfate	C15 H12 O8 S	352.025	5.041		S9253823	HMDB0141341	-0.0004	-1.2303			10	level4	Phenylpropanoids and polyketides	Flavonoids	Flavans	Flavonoids		other
5.076_187.9874	0.7724	0.2199	0.7494	0.2	0.6759	0.6627	SAT:PBS	C18:neg	2-chloro-5-methyl-cis-dienelactone	C7 H5 Cl O4	187.987	5.076	C18304	S7822270	HMDB0060345	-0.0002	-1.2725			2	level4	Organoheterocyclic compounds	Dihydrofurans	Furanones	Furanones		other
5.129_145.0527	1.0272	0.7718	0.9096	0.7	0.8766	0.2821	SAT:PBS	C18:neg	Fg7175000	C9 H7 N O	145.053	5.129	C06338	S5816		-0.0001	-0.6318			6	level4					NULL	other
5.169_276.1026	0.8851	0.375	0.7626	0.7	0.8766	0.1771	SAT:PBS	C18:neg		C12 H20 O5 S	276.103	5.169								0	level5						other
5.185_187.1206	0.4744	0.0187	0.4046	0.1	0.5784	1.8365	SAT:PBS	C18:neg	Pivagabine	C9 H17 N O3	187.121	5.185		S62118		-0.0003	-1.391			5	level4						down
5.192_227.0248	0.8646	0.4596	0.7836	0.7	0.8766	0.2764	SAT:PBS	C18:neg		C9 H9 N O4 S	227.025	5.192								0	level5						other
5.196_160.1098	0.8786	0.0319	0.4122	0.1	0.5784	0.4936	SAT:PBS	C18:neg	8-hydroxyoctanoic acid	C8 H16 O3	160.11	5.196		S63018	HMDB0061914	-0.0001	-0.7783			25	level4	Organic acids and derivatives	Hydroxy acids and derivatives	Medium-chain hydroxy acids and derivatives	Organic acids		other
5.203_287.0069	0.8957	0.5626	0.8368	1	1	0.2627	SAT:PBS	C18:neg		C6 H15 N3 O2 P2 S2	287.007	5.203								0	level5						other
5.203_426.0412	0.5835	0.3708	0.7626	0.7	0.8766	1.3256	SAT:PBS	C18:neg		C13 H20 N2 O8 P2 S	426.041	5.203								0	level5						other
5.204_122.0731	0.6658	0.3488	0.7614	0.4	0.7765	0.8707	SAT:PBS	C18:neg	2,5-dimethylphenol	C8 H10 O	122.073	5.204		MReference-3101	HMDB0030540	-0.0001	-0.4322		33.8	19	level3	Benzenoids	Benzene and substituted derivatives	Xylenes	Benzene and derivatives		other
5.204_202.0297	0.69	0.3443	0.7614	0.4	0.7765	0.7665	SAT:PBS	C18:neg	4-ethylphenylsulfonic acid	C8 H10 O4 S	202.03	5.204		S34448630	HMDB0062551	-0.0003	-1.5358			2	level4	Organic acids and derivatives	Organic sulfuric acids and derivatives	Arylsulfates	Organic acids		other
5.231_230.0244	0.5966	0.6511	0.8865	0.7	0.8766	0.6216	SAT:PBS	C18:neg	4-vinylguaiacol sulfate	C9 H10 O5 S	230.024	5.231		S58170415	HMDB0127980	-0.0005	-2.0627			14	level4	Organic acids and derivatives	Organic sulfuric acids and derivatives	Arylsulfates	Organic acids		other
5.257_165.0281	1.1241	0.7763	0.913	0.7	0.8766	0.3961	SAT:PBS	C18:neg	8-oxoguanine	C5 H3 N5 O2	165.028	5.257		S106574	HMDB0041820	-0.0006	-3.4977			2	level4	Organoheterocyclic compounds	Imidazopyrimidines	Purines and purine derivatives	Purines and derivatives		other
5.288_350.0092	2.2065	0.0053	0.4046	0.1	0.5784	1.135	SAT:PBS	C18:neg	Apigenin 7-sulfate	C15 H10 O8 S	350.009	5.288		S24843470	HMDB0037851	-0.0005	-1.2894			7	level4	Phenylpropanoids and polyketides	Flavonoids	Flavones	Flavonoids		up
5.302_232.1304	1.2352	0.8239	0.9325	1	1	0.2457	SAT:PBS	C18:neg		C11 H20 O5	232.13	5.302								0	level5						other
5.315_322.0505	0.6846	0.3054	0.7494	0.4	0.7765	0.6997	SAT:PBS	C18:neg	3,7-dihydroxy-2-(3-hydroxyphenyl)-5-chromanesulfinic acid	C15 H14 O6 S	322.05	5.315		S74852022	HMDB0127799	-0.0006	-1.8756			9	level4	Phenylpropanoids and polyketides	Flavonoids	Flavans	Flavonoids		other
5.316_666.0838	0.5605	0.3137	0.7494	0.4	0.7765	1.3015	SAT:PBS	C18:neg		C25 H33 O13 P3 S	666.084	5.316								0	level5						other
5.32_407.028	0.8102	0.3632	0.7626	0.4	0.7765	0.3972	SAT:PBS	C18:neg		C14 H20 N O5 P3 S	407.028	5.32								0	level5						other
5.34_394.0716	0.9058	0.7901	0.9206	1	1	0.3267	SAT:PBS	C18:neg		C18 H18 O8 S	394.072	5.34								0	level5						other
5.355_276.1026	1.0145	0.9894	0.9929	1	1	0.0808	SAT:PBS	C18:neg		C12 H20 O5 S	276.103	5.355								0	level5						other
5.371_269.1622	0.4469	0.1825	0.7494	0.2	0.6759	1.5922	SAT:PBS	C18:neg	Mfcd12912432	C14 H23 N O4	269.162	5.371		S8396552		-0.0005	-1.9476			3	level4						other
5.421_292.9336	2.5541	0.1598	0.7307	0.2	0.6759	1.4271	SAT:PBS	C18:neg		C5 H11 N O3 S5	292.934	5.421								0	level5						other
5.435_170.0942	1.0682	0.3053	0.7494	0.4	0.7765	0.3993	SAT:PBS	C18:neg	2-(diethoxymethyl)furan	C9 H14 O3	170.094	5.435	C14280	S75385		-0.0001	-0.7392			5	level4					NULL	other
5.448_352.0611	0.531	0.1635	0.7338	0.2	0.6759	1.1696	SAT:PBS	C18:neg	3,7-dihydroxy-2-(4-hydroxy-3-methoxyphenyl)-5-chromanesulfinic acid	C16 H16 O7 S	352.061	5.448		S74849511	HMDB0029176	-0.0006	-1.7746			7	level4	Phenylpropanoids and polyketides	Flavonoids	O-methylated flavonoids	Flavonoids		other
5.461_188.049	0.6565	0.689	0.8946	1	1	1.0704	SAT:PBS	C18:neg			188.049	5.461								0	level5						other
5.478_264.0661	0.5758	0.1702	0.7416	0.2	0.6759	1.5726	SAT:PBS	C18:neg		C10 H16 O6 S	264.066	5.478								0	level5						other
5.486_152.0472	1.0585	0.694	0.8946	1	1	0.3389	SAT:PBS	C18:neg	Vanillin	C8 H8 O3	152.047	5.486	C00755	MReference-2529	HMDB0012308	-0.0002	-1.0902	44.6	86.3	37	level2	Benzenoids	Phenols	Methoxyphenols	Phenols and derivatives	map01100 Metabolic pathways;	other
5.498_844.4093	0.2238	0.0962	0.6969	0.2	0.6759	3.0351	SAT:PBS	C18:neg		C34 H66 N6 O14 P2	844.409	5.498								0	level5						other
5.533_378.0768	0.9479	0.6888	0.8946	0.7	0.8766	0.3703	SAT:PBS	C18:neg		C18 H18 O7 S	378.077	5.533								0	level5						other
5.605_276.0119	0.5494	0.2824	0.7494	0.4	0.7765	1.1488	SAT:PBS	C18:neg	2-(2-chlorophenyl)-5-(5-methyl-2-thienyl)-1,3,4-oxadiazole	C13 H9 Cl N2 O S	276.012	5.605	C11570	S391529		-0.0005	-1.7969			1	level4					NULL	other
5.614_733.3646	0.1206	0.0131	0.4046	0.1	0.5784	2.6035	SAT:PBS	C18:neg		C32 H56 N5 O12 P	733.365	5.614								0	level5						down
5.641_320.1287	1.198	0.2679	0.7494	0.2	0.6759	0.2491	SAT:PBS	C18:neg	Enoxacin	C15 H17 F N4 O3	320.129	5.641	C06979	S3116	HMDB0014610	0.0003	0.8374			1	level4	Organoheterocyclic compounds	Diazines	Pyrimidines and pyrimidine derivatives	Pyrimidines and pyrimidine derivatives	NULL	other
5.68_354.0405	1.3584	0.7917	0.9206	0.7	0.8766	0.4773	SAT:PBS	C18:neg	Dihydronaringenin-o-sulphate	C15 H14 O8 S	354.041	5.68		S30778503	HMDB0059996	-0.0004	-1.2679			11	level4	Phenylpropanoids and polyketides	Linear 1,3-diarylpropanoids	Chalcones and dihydrochalcones	Polyketides[PK]		other
5.706_214.0296	0.6206	0.079	0.6739	0.1	0.5784	1.1549	SAT:PBS	C18:neg		C9 H10 O4 S	214.03	5.706								0	level5						other
5.763_158.0942	0.932	0.2755	0.7494	0.4	0.7765	0.3567	SAT:PBS	C18:neg	3683	C8 H14 O3	158.094	5.763	C02975	S208322	HMDB0031307	-0.0001	-0.8186			23	level4	Organic acids and derivatives	Keto acids and derivatives	Beta-keto acids and derivatives	Organic acids	NULL	other
5.789_302.1183	1.6006	0.433	0.7744	0.4	0.7765	0.4877	SAT:PBS	C18:neg	11343453	C17 H19 Cl N2 O	302.118	5.789	C18425	S9883971		-0.0003	-0.9642			1	level4					NULL	other
5.79_232.0401	0.5848	0.2439	0.7494	0.2	0.6759	1.8026	SAT:PBS	C18:neg	4-ethyl-2-methoxyphenyl hydrogen sulfate	C9 H12 O5 S	232.04	5.79		S74852087	HMDB0127988	-0.0004	-1.827			1	level4	Organic acids and derivatives	Organic sulfuric acids and derivatives	Arylsulfates	Organic acids		other
5.801_151.0091	1.1343	0.2687	0.7494	0.4	0.7765	0.6578	SAT:PBS	C18:neg	2-hydroxybenzothiazole	C7 H5 N O S	151.009	5.801		MReference-3040		-0.0001	-0.7025		82.1	2	level2						other
5.838_279.9227	0.9893	0.8713	0.951	1	1	0.1155	SAT:PBS	C18:neg		C4 H2 N4 O5 P2 S	279.923	5.838								0	level5						other
5.882_412.0822	1.2831	0.3142	0.7494	0.4	0.7765	0.5266	SAT:PBS	C18:neg		C12 H21 N4 O8 P S	412.082	5.882								0	level5						other
5.971_181.0052	0.6172	0.6685	0.8929	0.7	0.8766	1.0708	SAT:PBS	C18:neg	Thiocyclam	C5 H11 N S3	181.005	5.971	C11473	S33084		-0.0002	-0.9826			1	level4					NULL	other
5.976_184.1097	1.8174	0.0034	0.4046	0.1	0.5784	1.5403	SAT:PBS	C18:neg	9-oxodecenoic acid	C10 H16 O3	184.11	5.976		S1362276		-0.0002	-1.2215			21	level4						up
6.015_266.1512	0.797	0.1793	0.7494	0.2	0.6759	0.3753	SAT:PBS	C18:neg	Zinniol	C15 H22 O4	266.151	6.015	C10840	S78766		-0.0006	-2.1353			27	level4					NULL	other
6.029_230.1513	0.539	0.3084	0.7494	0.2	0.6759	1.6269	SAT:PBS	C18:neg	Dodecanedioic acid	C12 H22 O4	230.151	6.029	C02678	MReference-1182	HMDB0000623	-0.0005	-2.0172		86.5	8	level2	Lipids and lipid-like molecules	Fatty Acyls	Fatty acids and conjugates	Fatty acyls[FA]	NULL	other
6.043_204.042	1.6251	0.2383	0.7494	0.2	0.6759	0.6526	SAT:PBS	C18:neg	1,4-dihydroxy-2-naphthoic acid	C11 H8 O4	204.042	6.043	C03657	S651		-0.0002	-1.1652			6	level4					map00130 Ubiquinone and other terpenoid-quinone biosynthesis; map01100 Metabolic pathways;	other
6.088_254.0574	2.9505	0.0117	0.4046	0.1	0.5784	1.4792	SAT:PBS	C18:neg	Daidzein	C15 H10 O4	254.057	6.088	C10208	MReference-680	HMDB0003312	-0.0005	-1.9132		93.5	38	level2	Phenylpropanoids and polyketides	Isoflavonoids	Isoflav-2-enes	Flavonoids		up
6.091_348.0299	2.5643	0.0152	0.4046	0.1	0.5784	1.5811	SAT:PBS	C18:neg		C10 H13 N4 O6 P S	348.03	6.091								0	level5						up
6.17_260.0679	2.0333	0.0283	0.4046	0.1	0.5784	1.7936	SAT:PBS	C18:neg	Khellin	C14 H12 O5	260.068	6.17	C09010	S3696		-0.0006	-2.2641			16	level4	Polyketides	Pyrones	Chromones	Polyketides[PK]		up
6.179_254.0244	0.8218	0.2896	0.7494	0.4	0.7765	0.3607	SAT:PBS	C18:neg		C11 H10 O5 S	254.024	6.179								0	level5						other
6.228_366.0405	1.2822	0.7647	0.9087	1	1	0.2846	SAT:PBS	C18:neg	6-hydroxy-3-[(1z)-3-(3-hydroxyphenyl)-3-oxo-1-propen-1-yl]-2-methoxyphenyl hydrogen sulfate	C16 H14 O8 S	366.041	6.228		S74851853	HMDB0126071	-0.0005	-1.2517			4	level4	Phenylpropanoids and polyketides	Linear 1,3-diarylpropanoids	Chalcones and dihydrochalcones	Polyketides[PK]		other
6.354_280.1305	1.0957	0.4121	0.769	0.4	0.7765	0.2377	SAT:PBS	C18:neg	Phaseic acid	C15 H20 O5	280.13	6.354	C09707	S4444860		-0.0005	-1.8974			18	level4	Terpenoids	Sesquiterpenoids (C15)	Others	Terpenoids		other
6.367_278.1183	0.4576	0.088	0.6739	0.2	0.6759	2.1624	SAT:PBS	C18:neg	3-(7'-methylthio)heptylmalic acid	C12 H22 O5 S	278.118	6.367	C17231	S24808178		-0.0005	-1.8888			2	level4					map01210 2-Oxocarboxylic acid metabolism;	other
6.383_201.1363	0.4668	0.0049	0.4046	0.1	0.5784	1.6922	SAT:PBS	C18:neg	Capryloylglycine	C10 H19 N O3	201.136	6.383		MReference-339	HMDB0000832	-0.0002	-1.1145		88.6	4	level2	Organic acids and derivatives	Carboxylic acids and derivatives	Amino acids, peptides, and analogues	Amino acids, peptides, and analogues		down
6.407_221.9482	0.8314	0.3348	0.7614	0.7	0.8766	0.5856	SAT:PBS	C18:neg		C5 H4 O6 P2	221.948	6.407								0	level5						other
6.418_510.2793	0.9317	0.6612	0.8895	1	1	0.1905	SAT:PBS	C18:neg		C22 H42 N2 O11	510.279	6.418								0	level5						other
6.419_337.1133	0.9485	0.4909	0.8006	0.7	0.8766	0.0889	SAT:PBS	C18:neg		C13 H26 N O3 P3	337.113	6.419								0	level5						other
6.419_526.2528	0.812	0.3807	0.7653	0.4	0.7765	0.4052	SAT:PBS	C18:neg		C26 H34 N6 O6	526.253	6.419								0	level5						other
6.474_183.0352	0.956	0.472	0.7928	0.7	0.8766	0.2025	SAT:PBS	C18:neg	2822	C8 H9 N O2 S	183.035	6.474		S31127		-0.0002	-1.0036			2	level4						other
6.504_270.0523	2.9775	0.009	0.4046	0.1	0.5784	1.5676	SAT:PBS	C18:neg	Genistein	C15 H10 O5	270.052	6.504	C06563	MReference-24	HMDB0003217	-0.0005	-2.022		93.1	39	level2	Phenylpropanoids and polyketides	Isoflavonoids	Isoflav-2-enes	Flavonoids	map01100 Metabolic pathways;	up
6.523_208.0766	1.1424	0.6287	0.873	0.7	0.8766	0.3087	SAT:PBS	C18:neg	(1s,2r)-2-(6-chloro-3-pyridinyl)-7-azabicyclo[2.2.1]heptane	C11 H13 Cl N2	208.077	6.523	C11690	S391599		-0.0001	-0.5456			1	level4	Venoms	Frog venoms	Alkaloids	Venoms	NULL	other
6.528_304.134	1.1857	0.8126	0.9303	1	1	0.1753	SAT:PBS	C18:neg	Flupirtine	C15 H17 F N4 O2	304.134	6.528		S48119		0.0004	1.4195			1	level4						other
6.546_444.1624	0.9011	0.2391	0.7494	0.2	0.6759	0.2423	SAT:PBS	C18:neg		C14 H29 N4 O10 P	444.162	6.546								0	level5						other
6.636_278.1148	0.6216	0.0179	0.4046	0.1	0.5784	1.0323	SAT:PBS	C18:neg	Canin	C15 H18 O5	278.115	6.636	C09354	S390688		-0.0006	-2.0633			16	level4	Terpenoids	Sesquiterpenoids (C15)	Guaianolide	Terpenoids	NULL	down
6.738_336.0663	0.6982	0.4092	0.769	0.7	0.8766	0.7622	SAT:PBS	C18:neg	3,7-dihydroxy-2-(3-methoxyphenyl)-5-chromanesulfinic acid	C16 H16 O6 S	336.066	6.738		S74852020	HMDB0127797	-0.0005	-1.3537			8	level4	Phenylpropanoids and polyketides	Flavonoids	O-methylated flavonoids	Flavonoids		other
6.742_186.1253	1.6467	0.0051	0.4046	0.1	0.5784	1.3672	SAT:PBS	C18:neg	Queen bee acid	C10 H18 O3	186.125	6.742		S4472163		-0.0002	-1.2937			38	level4						up
6.749_260.0614	1.3753	0.448	0.7805	0.7	0.8766	1.0712	SAT:PBS	C18:neg		C13 H12 N2 O2 S	260.061	6.749								0	level5						other
6.762_276.0662	1.3853	0.2728	0.7494	0.1	0.5784	0.3883	SAT:PBS	C18:neg	4-(3-hydroxybutyl)-2-methoxyphenyl hydrogen sulfate	C11 H16 O6 S	276.066	6.762		S74853929	HMDB0135717	-0.0006	-2.0021			2	level4	Organic acids and derivatives	Organic sulfuric acids and derivatives	Arylsulfates	Organic acids		other
6.771_226.0789	47.1626	0.6552	0.8895	1	1	2.0326	SAT:PBS	C18:neg	Cyclopenta[cd]pyrene	C18 H10	226.079	6.771	C19173	S31107		0.0007	3.0149			2	level4					NULL	other
6.82_308.0713	1.1048	0.1016	0.6996	0.2	0.6759	0.1287	SAT:PBS	C18:neg	Pinazepam	C18 H13 Cl N2 O	308.071	6.82		S36899	HMDB0041988	-0.0003	-1.0977			1	level4	Organoheterocyclic compounds	Benzodiazepines	1,4-benzodiazepines	1,4-benzodiazepines		other
6.825_227.1518	0.5805	0.2038	0.7494	0.4	0.7765	1.5135	SAT:PBS	C18:neg		C12 H21 N O3	227.152	6.825								1	level5						other
6.828_330.0734	1.5305	0.2288	0.7494	0.4	0.7765	0.7317	SAT:PBS	C18:neg	Aflatoxin g2	C17 H14 O7	330.073	6.828	C16754	MReference-302	HMDB0030475	-0.0005	-1.591		37.6	85	level3	Phenylpropanoids and polyketides	Coumarins and derivatives	Furanocoumarins	Coumarins and derivatives	map01100 Metabolic pathways;	other
6.859_314.1261	1.4975	0.145	0.7307	0.2	0.6759	1.402	SAT:PBS	C18:neg		C17 H18 N2 O4	314.126	6.859								0	level5						other
6.925_327.0334	21.8756	0.641	0.8857	0.4	0.7765	1.9264	SAT:PBS	C18:neg	Mfcd00142136	C12 H13 N3 O4 S2	327.033	6.925	C18387	S78653		-0.0013	-4.1204			1	level4					NULL	other
6.926_506.0936	144.449	0.4164	0.7698	0.2	0.6759	3.3035	SAT:PBS	C18:neg		C17 H28 N6 O2 P2 S3	506.094	6.926								0	level5						other
6.964_174.025	1.1485	0.2135	0.7494	0.2	0.6759	0.7434	SAT:PBS	C18:neg	Brassilexin	C9 H6 N2 S	174.025	6.964		S19992709	HMDB0039638	-0.0002	-1.115			1	level4	Organoheterocyclic compounds	Indoles and derivatives	Indoles	Indoles		other
7_254.1513	1.1104	0.4967	0.8063	0.7	0.8766	0.2447	SAT:PBS	C18:neg	(5z)-7,10-dihydroxy-5-tetradecen-8-ynoic acid	C14 H22 O4	254.151	7		S113368287		-0.0005	-2.0815			1	level4						other
7.036_314.126	1.5084	0.2529	0.7494	0.2	0.6759	1.2701	SAT:PBS	C18:neg		C17 H18 N2 O4	314.126	7.036								0	level5						other
7.084_320.1383	0.9607	0.8261	0.9325	1	1	0.2331	SAT:PBS	C18:neg	Eterobarb	C16 H20 N2 O5	320.138	7.084		S31271		0.0011	3.3329			2	level4						other
7.104_188.141	0.6565	0.0833	0.6739	0.1	0.5784	1.1902	SAT:PBS	C18:neg	3-hydroxydecanoic acid	C10 H20 O3	188.141	7.104		MReference-200	HMDB0002203	-0.0002	-1.2402		82.4	24	level2	Organic acids and derivatives	Hydroxy acids and derivatives	Medium-chain hydroxy acids and derivatives	Organic acids		other
7.131_239.1517	0.5835	0.0471	0.5081	0.1	0.5784	1.0592	SAT:PBS	C18:neg	Salbutamol	C13 H21 N O3	239.152	7.131		S1999	HMDB0001937	-0.0005	-1.9773			7	level4	Benzenoids	Benzene and substituted derivatives	Benzyl alcohols	Alcohols		down
7.166_390.2358	0.6923	0.1691	0.7416	0.2	0.6759	1.3718	SAT:PBS	C18:neg		C18 H34 N2 O7	390.236	7.166								0	level5						other
7.177_376.1914	0.7433	0.4867	0.8006	0.4	0.7765	0.7775	SAT:PBS	C18:neg		C18 H32 O6 S	376.191	7.177								0	level5						other
7.181_267.1465	0.4919	0.0866	0.6739	0.1	0.5784	1.2568	SAT:PBS	C18:neg	Diethofencarb	C14 H21 N O4	267.147	7.181	C11077	S82840		-0.0006	-2.2071			2	level4					NULL	other
7.216_330.1972	0.4466	0.018	0.4046	0.1	0.5784	2.5895	SAT:PBS	C18:neg	(2e,4e,6e,8e,10e,12e,14e,16e,18e,20e,22e)-2,4,6,8,10,12,14,16,18,20,22-tetracosaundecaenal	C24 H26 O	330.197	7.216		S113368513		-0.0012	-3.5953			1	level4						down
7.23_432.2141	0.9263	0.6602	0.8895	1	1	0.11	SAT:PBS	C18:neg	Schisandrin	C24 H32 O7	432.214	7.23	C17064	S22358		-0.0007	-1.6334			11	level4					NULL	other
7.275_392.2193	0.8059	0.4709	0.7928	0.7	0.8766	0.8717	SAT:PBS	C18:neg	Isodomedin	C22 H32 O6	392.219	7.275	C09115	S390594		-0.0006	-1.4067		54.4	7	level4	Terpenoids	Diterpenoids (C20)	Kaurenes	Terpenoids	NULL	other
7.276_188.141	1.3347	0.0014	0.2673	0.1	0.5784	1.3844	SAT:PBS	C18:neg	10-hydroxydecanoic acid	C10 H20 O3	188.141	7.276	C02774	MReference-280		-0.0002	-1.2282		83.8	24	level2	FA Fatty acyls	FA01 Fatty Acids and Conjugates	FA0105 Hydroxy fatty acids	Fatty acyls[FA]	NULL	up
7.276_409.2094	0.7615	0.366	0.7626	0.7	0.8766	1.0798	SAT:PBS	C18:neg		C21 H31 N O7	409.209	7.276								0	level5						other
7.277_382.1905	0.7627	0.4052	0.769	0.7	0.8766	1.0132	SAT:PBS	C18:neg	Tofisopam	C22 H26 N2 O4	382.19	7.277		S5301	HMDB0015699	0.0013	3.3245			7	level4	Organoheterocyclic compounds	Benzodiazepines	null	Benzodiazepines		other
7.344_364.1881	1.4884	0.2957	0.7494	0.7	0.8766	0.5544	SAT:PBS	C18:neg	4beta-phorbol	C20 H28 O6	364.188	7.344	C09155	S390610		-0.0005	-1.3197			24	level4	Terpenoids	Diterpenoids (C20)	Tiglianes	Terpenoids	map04750 Inflammatory mediator regulation of TRP channels;	other
7.35_278.0106	0.981	0.8081	0.9271	0.7	0.8766	0.0561	SAT:PBS	C18:neg	3-(3,4-dihydroxyphenyl)-2-(sulfooxy)propanoic acid	C9 H10 O8 S	278.011	7.35		S10208704	HMDB0124972	0.001	3.6106			4	level4	Phenylpropanoids and polyketides	Phenylpropanoic acids	null	Phenylpropanoic acids		other
7.393_271.1778	0.8458	0.5194	0.8152	0.7	0.8766	0.5351	SAT:PBS	C18:neg	3-hydroxy-n-[(3s)-2-oxotetrahydro-3-furanyl]decanamide	C14 H25 N O4	271.178	7.393		S29341814		-0.0006	-2.2507			1	level4						other
7.427_352.1648	0.9259	0.7187	0.8946	1	1	0.2623	SAT:PBS	C18:neg		C15 H29 O7 P	352.165	7.427								0	level5						other
7.433_258.1826	0.9104	0.6432	0.8858	1	1	0.3518	SAT:PBS	C18:neg	Tetradecanedioic acid	C14 H26 O4	258.183	7.433		MReference-1652	HMDB0000872	-0.0005	-2.0032		94.4	9	level2	Lipids and lipid-like molecules	Fatty Acyls	Fatty acids and conjugates	Fatty acyls[FA]		other
7.441_376.1914	1.1937	0.02	0.4046	0.1	0.5784	0.2478	SAT:PBS	C18:neg		C18 H32 O6 S	376.191	7.441								0	level5						other
7.463_164.1199	0.7883	0.2428	0.7494	0.2	0.6759	0.898	SAT:PBS	C18:neg	4-tert-amylphenol	C11 H16 O	164.12	7.463	C14205	MReference-2777	HMDB0013825	-0.0002	-1.0213		63.9	18	level2	Benzenoids	Benzene and substituted derivatives	Phenylpropanes	Benzene and derivatives	NULL	other
7.496_352.8352	1.1231	0.3652	0.7626	0.2	0.6759	0.1822	SAT:PBS	C18:neg			352.835	7.496								0	level5						other
7.496_354.8332	1.1367	0.4077	0.769	0.4	0.7765	0.2047	SAT:PBS	C18:neg		C8 H4 Cl N O P2 S4	354.833	7.496								0	level5						other
7.546_240.1357	0.9014	0.2434	0.7494	0.4	0.7765	0.6022	SAT:PBS	C18:neg	(2s,4e,6e,8s,9r)-9-hydroxy-2,8-dimethyl-3-oxo-4,6-undecadienoic acid	C13 H20 O4	240.136	7.546		S113369099		-0.0005	-2.0907			1	level4						other
7.575_266.1148	0.9712	0.7303	0.8946	0.7	0.8766	0.053	SAT:PBS	C18:neg	(2z)-3-(3,4,5-trimethoxyphenyl)-2-propen-1-yl acetate	C14 H18 O5	266.115	7.575		S30777517	HMDB0040891	-0.0006	-2.2485			8	level4	Benzenoids	Phenol ethers	Anisoles	Benzene and derivatives		other
7.619_322.154	1.112	0.7531	0.9076	1	1	0.2511	SAT:PBS	C18:neg	Etifenin	C16 H22 N2 O5	322.154	7.619		S148943		0.0011	3.5268			2	level4						other
7.652_378.2037	1.6615	0.1798	0.7494	0.4	0.7765	0.8282	SAT:PBS	C18:neg	Mfcd00273304	C21 H30 O6	378.204	7.652	C15291	S223204		-0.0006	-1.5295			9	level4					NULL	other
7.653_394.1985	2.1342	0.0071	0.4046	0.1	0.5784	1.2418	SAT:PBS	C18:neg	Nigakilactone n	C21 H30 O7	394.199	7.653	C17036	S30791716		-0.0007	-1.7348			3	level4	Terpenoids	Triterpenoids (C30)	Dammarenes	Terpenoids	NULL	up
7.669_241.1673	0.9305	0.7296	0.8946	0.7	0.8766	0.3404	SAT:PBS	C18:neg	Valeroidine	C13 H23 N O3	241.167	7.669	C10869	S391313		-0.0005	-2.0014			3	level4	Alkaloids	Alkaloids derived from ornithine	Tropane alkaloids	Alkaloids	NULL	other
7.67_358.1809	1.2987	0.6874	0.8946	0.7	0.8766	0.4808	SAT:PBS	C18:neg		C18 H30 O5 S	358.181	7.67								0	level5						other
7.698_452.2765	1.0526	0.8213	0.9325	1	1	0.4891	SAT:PBS	C18:neg	Methyl (6z,9alpha,11alpha,13e,15s)-11,15-diacetoxy-9-hydroxyprosta-6,13-dien-1-oate	C25 H40 O7	452.276	7.698		S34981329		-0.0009	-1.9915			1	level4						other
7.703_454.2922	0.6209	0.4411	0.7785	0.4	0.7765	0.784	SAT:PBS	C18:neg	Methyl (9alpha,11alpha,13e,15s)-11,15-diacetoxy-9-hydroxyprost-13-en-1-oate	C25 H42 O7	454.292	7.703		S34981331		-0.0008	-1.8201		89.9	1	level4						other
7.715_292.0764	1.0376	0.5821	0.8494	0.7	0.8766	0.0431	SAT:PBS	C18:neg	1,3-diphenyl-2-propanyl hydrogen sulfate	C15 H16 O4 S	292.076	7.715		S74853879	HMDB0135553	-0.0006	-1.9213			4	level4	Phenylpropanoids and polyketides	Linear 1,3-diarylpropanoids	null	Polyketides[PK]		other
7.752_270.1824	0.8772	0.5829	0.8494	1	1	0.5724	SAT:PBS	C18:neg	3543	C15 H26 O4	270.182	7.752		S54974	HMDB0040459	-0.0007	-2.5619			2	level4	Phenylpropanoids and polyketides	Macrolides and analogues	null	Polyketides[PK]		other
7.768_250.1563	0.7061	0.019	0.4046	0.1	0.5784	1.0188	SAT:PBS	C18:neg	Gemfibrozil	C15 H22 O3	250.156	7.768	C07020	S3345	HMDB0015371	-0.0006	-2.3395			44	level4	Benzenoids	Phenol ethers	null	Benzene and derivatives	NULL	down
7.771_214.1566	0.7242	0.1602	0.7307	0.2	0.6759	0.9179	SAT:PBS	C18:neg	3-oxolauric acid	C12 H22 O3	214.157	7.771	C02367	S388783	HMDB0010727	-0.0003	-1.2895			16	level4	Organic acids and derivatives	Keto acids and derivatives	Medium-chain keto acids and derivatives	Organic acids	NULL	other
7.771_360.1964	0.9549	0.8643	0.947	0.7	0.8766	0.1082	SAT:PBS	C18:neg		C18 H32 O5 S	360.196	7.771							61.8	0	level5						other
7.845_238.1564	0.7658	0.2295	0.7494	0.2	0.6759	0.7778	SAT:PBS	C18:neg	4-{(1r,2r)-3-oxo-2-[(2z)-2-penten-1-yl]cyclopentyl}butanoic acid	C14 H22 O3	238.156	7.845		S4653752		-0.0005	-2.0173			8	level4						other
7.85_201.0189	1.0661	0.5596	0.8368	0.7	0.8766	0.3262	SAT:PBS	C18:neg		C8 H8 Cl N O3	201.019	7.85								0	level5						other
7.961_360.1964	1.6532	0.3188	0.7494	0.4	0.7765	0.9301	SAT:PBS	C18:neg		C18 H32 O5 S	360.196	7.961							61.1	0	level5						other
7.963_382.1782	1.3601	0.0811	0.6739	0.1	0.5784	0.4627	SAT:PBS	C18:neg		C15 H30 N2 O7 S	382.178	7.963								0	level5						other
8.06_372.2143	0.6616	0.1311	0.7307	0.2	0.6759	0.6471	SAT:PBS	C18:neg		C19 H32 O7	372.214	8.06								0	level5						other
8.107_345.1605	0.7246	0.2467	0.7494	0.4	0.7765	0.9046	SAT:PBS	C18:neg		C16 H27 N O5 S	345.161	8.107								0	level5						other
8.123_284.1982	1.0048	0.9289	0.9778	1	1	0.0412	SAT:PBS	C18:neg	(10s)-juvenile hormone iii diol	C16 H28 O4	284.198	8.123	C16505	S9034333		-0.0006	-1.9868			2	level4						other
8.25_216.1721	0.5148	0.1384	0.7307	0.1	0.5784	1.6622	SAT:PBS	C18:neg	12-hydroxydodecanoic acid	C12 H24 O3	216.172	8.25	C08317	MReference-281	HMDB0002059	-0.0004	-2.0795		73.6	15	level2	Organic acids and derivatives	Hydroxy acids and derivatives	Medium-chain hydroxy acids and derivatives	Organic acids	NULL	other
8.304_196.1459	0.806	0.1521	0.7307	0.1	0.5784	0.8238	SAT:PBS	C18:neg	Acetic acid geranyl ester	C12 H20 O2	196.146	8.304	C09861	S1266019	HMDB0035157	-0.0004	-2.0217			63	level4	Terpenoids	Monoterpenoids (C10)	Linear monoterpenes	Terpenoids	NULL	other
8.336_286.2138	1.0349	0.784	0.9163	0.7	0.8766	0.1887	SAT:PBS	C18:neg	Hexadecanedioic acid	C16 H30 O4	286.214	8.336	C19615	MReference-2712	HMDB0000672	-0.0006	-2.1511		82.8	6	level2	Lipids and lipid-like molecules	Fatty Acyls	Fatty acids and conjugates	Fatty acyls[FA]	map01100 Metabolic pathways;	other
8.382_499.9363	1.3991	0.4222	0.7706	0.4	0.7765	0.8113	SAT:PBS	C18:neg	Perfluorooctanesulfonic acid	C8 H F17 O3 S	499.936	8.382	C18142	S67068	HMDB0059586	-0.0012	-2.4214			1	level4	Organohalogen compounds	Alkyl halides	Alkyl fluorides	Alkyl fluorides	NULL	other
8.389_314.2451	0.6362	0.0856	0.6739	0.1	0.5784	1.2109	SAT:PBS	C18:neg	(+/-)12(13)-dihome	C18 H34 O4	314.245	8.389	C14829	MReference-6638	HMDB0004705	-0.0006	-1.8341		91.7	44	level2	Lipids and lipid-like molecules	Fatty Acyls	Fatty acids and conjugates	Fatty acyls[FA]		other
8.438_408.2868	1.2269	0.8755	0.9518	1	1	0.4233	SAT:PBS	C18:neg	Cholic acid	C24 H40 O5	408.287	8.438	C00695	MReference-344	HMDB0000619	-0.0008	-1.8987		86.5	85	level2	Lipids and lipid-like molecules	Steroids and steroid derivatives	Bile acids, alcohols and derivatives	Bile acids, alcohols and derivatives	map00120 Primary bile acid biosynthesis; map01100 Metabolic pathways; map04976 Bile secretion;	other
8.477_254.1877	0.6865	0.0099	0.4046	0.1	0.5784	0.7354	SAT:PBS	C18:neg	Prohydrojasmon	C15 H26 O3	254.188	8.477	C18538	S16738647		-0.0005	-2.0401			12	level4					NULL	other
8.482_266.164	0.7032	0.4873	0.8006	0.4	0.7765	1.7732	SAT:PBS	C18:neg	Dl-atenolol	C14 H22 N2 O3	266.164	8.482		S2162	HMDB0001924	0.001	3.7682			8	level4	Benzenoids	Benzene and substituted derivatives	Phenylacetamides	Benzene and derivatives		other
8.492_500.2907	0.6953	0.2566	0.7494	0.4	0.7765	1.0736	SAT:PBS	C18:neg		C19 H45 N6 O5 P S	500.291	8.492								0	level5						other
8.495_314.2451	0.6389	0.0917	0.6767	0.1	0.5784	1.6422	SAT:PBS	C18:neg	(+/-)9,10-dihydroxy-12z-octadecenoic acid	C18 H34 O4	314.245	8.495		MReference-9799		-0.0006	-1.8074		89.1	44	level2						other
8.504_422.1617	0.9969	0.9342	0.9796	1	1	0.0657	SAT:PBS	C18:neg	Losartan	C22 H23 Cl N6 O	422.162	8.504	C07072	S3824	HMDB0014816	-0.0005	-1.164			3	level4	Benzenoids	Benzene and substituted derivatives	Biphenyls and derivatives	Benzene and derivatives	NULL	other
8.507_282.1412	32.9274	0.7552	0.9076	1	1	1.6681	SAT:PBS	C18:neg			282.141	8.507								0	level5						other
8.516_386.2299	0.5358	0.1105	0.6996	0.1	0.5784	0.9713	SAT:PBS	C18:neg	Oleandolide	C20 H34 O7	386.23	8.516	C11990	S20016206		-0.0005	-1.408			3	level4	PK Polyketides	PK04 Macrolides and lactone polyketides	Null	Polyketides[PK]	map01100 Metabolic pathways;	other
8.517_353.1652	0.8513	0.5856	0.8511	1	1	0.796	SAT:PBS	C18:neg		C12 H28 N5 O3 P S	353.165	8.517								0	level5						other
8.525_499.2956	2.63	0.1178	0.7106	0.1	0.5784	2.2369	SAT:PBS	C18:neg	Tauroursodeoxycholic acid	C26 H45 N O6 S	499.296	8.525	C16868	MReference-9838	HMDB0000874	-0.0011	-2.2907		88.4	4	level2	Lipids and lipid-like molecules	Steroids and steroid derivatives	Bile acids, alcohols and derivatives	Bile acids, alcohols and derivatives	NULL	other
8.549_386.2088	0.8689	0.5316	0.8193	0.4	0.7765	0.3918	SAT:PBS	C18:neg	Anecortave	C23 H30 O5	386.209	8.549		S99892		-0.0005	-1.2163			13	level4						other
8.717_312.2295	0.8539	0.3161	0.7494	0.7	0.8766	0.5408	SAT:PBS	C18:neg	(+/-)9-hpode	C18 H32 O4	312.229	8.717		MReference-9923		-0.0005	-1.7454		71.5	51	level2						other
8.741_338.2452	2.5196	0.6875	0.8946	0.4	0.7765	1.0994	SAT:PBS	C18:neg	(+/-)8(9)-dihet	C20 H34 O4	338.245	8.741		MReference-9841		-0.0006	-1.6472		54	19	level3						other
8.747_557.4649	0.8066	0.2556	0.7494	0.4	0.7765	0.6186	SAT:PBS	C18:neg		C33 H59 N5 O2	557.465	8.747								0	level5						other
8.832_502.3065	0.9141	0.675	0.8946	1	1	0.5121	SAT:PBS	C18:neg	Kolanone	C33 H42 O4	502.307	8.832	C09948	S30791168		-0.0018	-3.639			2	level4					NULL	other
8.848_318.219	0.9733	0.8281	0.9329	1	1	0.2355	SAT:PBS	C18:neg	(+/-)18-hepe	C20 H30 O3	318.219	8.848		MReference-9802		-0.0005	-1.64		74.5	86	level2						other
8.929_268.2031	0.6635	0.2006	0.7494	0.4	0.7765	1.1743	SAT:PBS	C18:neg	(2s)-3-{[(1z)-10-methyl-1-dodecen-3-yn-1-yl]oxy}-1,2-propanediol	C16 H28 O3	268.203	8.929		S9024828		-0.0007	-2.7687			8	level4						other
9.04_244.2032	0.6843	0.1341	0.7307	0.1	0.5784	1.046	SAT:PBS	C18:neg	Mfcd00059633	C14 H28 O3	244.203	9.04		S15252		-0.0006	-2.5776			15	level4						other
9.044_438.2973	1.6912	0.5929	0.8541	1	1	1.1147	SAT:PBS	C18:neg	(1s,2r,5r,6r,7s,8r,10s,12r,13s)-8,12-dihydroxy-6,12-bis(hydroxymethyl)-2,6-dimethyltetracyclo[11.2.1.0~1,10~.0~2,7~]hexadec-5-yl 3-methylbutanoate	C25 H42 O6	438.297	9.044		S24846780		-0.0008	-1.8258		89.1	1	level4						other
9.046_392.292	1.6407	0.5996	0.8541	1	1	1.1007	SAT:PBS	C18:neg	Deoxycholic acid	C24 H40 O4	392.292	9.046	C04483	MReference-388	HMDB0000626	-0.0006	-1.6518		92.4	57	level2	Lipids and lipid-like molecules	Steroids and steroid derivatives	Bile acids, alcohols and derivatives	Bile acids, alcohols and derivatives	map04976 Bile secretion;	other
9.073_251.1516	1.0522	0.4571	0.7836	0.7	0.8766	0.2638	SAT:PBS	C18:neg	Lt9970000	C14 H21 N O3	251.152	9.073	C18912	S39512		-0.0006	-2.23			1	level4					NULL	other
9.081_476.3127	0.6395	0.1039	0.6996	0.2	0.6759	1.3715	SAT:PBS	C18:neg	(1s,2s,3r,4r,5r,7s,8r,11s,14z,17s)-5,8,11,15-tetramethyl-10,18-dioxatetracyclo[9.7.0.0~2,7~.0~3,17~]octadec-14-ene-4,12-diyl dibutanoate	C28 H44 O6	476.313	9.081		S113385737		-0.0011	-2.2293			2	level4						other
9.091_344.2346	0.8617	0.6794	0.8946	0.7	0.8766	0.5547	SAT:PBS	C18:neg	Medroxyprogesterone	C22 H32 O3	344.235	9.091	C07119	MReference-1321	HMDB0001939	-0.0006	-1.611		55.9	43	level3	Lipids and lipid-like molecules	Steroids and steroid derivatives	Pregnane steroids	Steroids and derivatives	NULL	other
9.101_485.3706	1.037	0.6598	0.8895	1	1	0.1951	SAT:PBS	C18:neg		C27 H51 N O6	485.371	9.101								0	level5						other
9.109_664.4698	0.8715	0.7662	0.9087	0.7	0.8766	0.5897	SAT:PBS	C18:neg	(15z,19r,25s)-22,25,26-trihydroxy-22-oxido-17,21,23-trioxa-22lambda~5~-phosphahexacos-15-en-19-yl tridecanoate	C35 H69 O9 P	664.47	9.109		S113377723		0.0019	2.8309			1	level4						other
9.11_298.2502	0.6357	0.0277	0.4046	0.1	0.5784	1.7629	SAT:PBS	C18:neg	Ricinelaidic acid	C18 H34 O3	298.25	9.11		S393218		-0.0006	-2.109			74	level4						down
9.113_224.1771	0.5865	0.1164	0.71	0.2	0.6759	1.5668	SAT:PBS	C18:neg	2512	C14 H24 O2	224.177	9.113		S4511745		-0.0005	-2.4009			55	level4						other
9.125_320.2345	0.9558	0.7976	0.9227	1	1	0.3672	SAT:PBS	C18:neg	(+/-)11(12)-eet	C20 H32 O3	320.235	9.125		MReference-9807		-0.0006	-1.9971		89.4	85	level2						other
9.231_294.2188	0.7902	0.1487	0.7307	0.2	0.6759	0.8966	SAT:PBS	C18:neg	13(s)-hotre	C18 H30 O3	294.219	9.231	C16316	MReference-9864		-0.0007	-2.393		80.7	76	level2	FA Fatty acyls	FA02 Octadecanoids	FA0200 Other Octadecanoids	Fatty acyls[FA]	map00592 alpha-Linolenic acid metabolism;	other
9.241_346.2503	0.759	0.4221	0.7706	0.4	0.7765	0.8142	SAT:PBS	C18:neg	Ginkgoic acid	C22 H34 O3	346.25	9.241	C10794	S4445152	HMDB0033897	-0.0005	-1.5109		55.6	13	level4	Benzenoids	Benzene and substituted derivatives	Benzoic acids and derivatives	Benzene and derivatives	NULL	other
9.251_584.2626	1.6071	0.0277	0.4046	0.1	0.5784	1.7587	SAT:PBS	C18:neg	Bilirubin	C33 H36 N4 O6	584.263	9.251	C00486	MReference-334	HMDB0000054	-0.0008	-1.4381		84.8	6	level2	Organoheterocyclic compounds	Tetrapyrroles and derivatives	Bilirubins	Bilirubins	map00860 Porphyrin and chlorophyll metabolism; map01100 Metabolic pathways; map04976 Bile secretion;	up
9.253_322.2502	0.8433	0.3287	0.7588	0.4	0.7765	0.5539	SAT:PBS	C18:neg	15-oxoede	C20 H34 O3	322.25	9.253		MReference-9905		-0.0006	-1.8235		67.3	26	level2						other
9.253_340.2607	0.9194	0.3222	0.7494	0.4	0.7765	0.3079	SAT:PBS	C18:neg	Prostaglandin e1 alcohol	C20 H36 O4	340.261	9.253		S4446181		-0.0007	-2.0407			7	level4						other
9.292_618.2807	0.8718	0.58	0.8494	0.4	0.7765	0.3251	SAT:PBS	C18:neg	(2r)-2-hydroxy-3-[(hydroxy{[(1s,2r,3r,4s,5s,6r)-2,3,4,5,6-pentahydroxycyclohexyl]oxy}phosphoryl)oxy]propyl (5z,8z,11z,14z,17z)-5,8,11,14,17-icosapentaenoate	C29 H47 O12 P	618.281	9.292		S113378816		0.0002	0.2641			1	level4						other
9.306_464.3493	0.9911	0.8324	0.9354	0.7	0.8766	0.027	SAT:PBS	C18:neg	Castasterone	C28 H48 O5	464.349	9.306		S117794		-0.0009	-1.943			11	level4						other
9.308_320.2346	0.9113	0.563	0.8368	0.7	0.8766	0.3164	SAT:PBS	C18:neg	11,12-epoxy-(5z,8z,11z)-icosatrienoic acid	C20 H32 O3	320.235	9.308	C14770	MReference-1453		-0.0006	-1.7904		71.8	85	level2	FA Fatty acyls	FA03 Eicosanoids	FA0305 Hydroxy/hydroperoxyeicosatrienoic acids	Fatty acyls[FA]	map00590 Arachidonic acid metabolism; map01100 Metabolic pathways; map04270 Vascular smooth muscle contraction; map04726 Serotonergic synapse; map04913 Ovarian steroidogenesis;	other
9.344_422.233	0.7835	0.3413	0.7614	0.4	0.7765	0.9251	SAT:PBS	C18:neg	1,4-bis(2-ethylhexyl) sulfosuccinate	C20 H38 O7 S	422.233	9.344	C07874	S10862		-0.0008	-1.9157			1	level4					NULL	other
9.349_322.2266	8.0577	0.9006	0.9659	0.7	0.8766	1.0637	SAT:PBS	C18:neg		C16 H35 O4 P	322.227	9.349								0	level5						other
9.434_296.2346	0.8098	0.273	0.7494	0.7	0.8766	0.7979	SAT:PBS	C18:neg	(+/-)9-hode	C18 H32 O3	296.235	9.434		MReference-9776		-0.0005	-1.8451		78.5	55	level2						other
9.434_348.1783	1.0492	0.5478	0.8368	0.7	0.8766	0.2994	SAT:PBS	C18:neg	2-hydroxy-2-(4-methyl-2-oxocyclohexyl)propyl hexopyranoside	C16 H28 O8	348.178	9.434	C17638	S30791612		-0.0001	-0.3784			2	level4					NULL	other
9.473_348.2656	0.7431	0.3767	0.763	0.4	0.7765	0.8146	SAT:PBS	C18:neg	Anacardic acid	C22 H36 O3	348.266	9.473	C10759	S146579	HMDB0029683	-0.0008	-2.4032			8	level4	Benzenoids	Benzene and substituted derivatives	Benzoic acids and derivatives	Benzene and derivatives	NULL	other
9.485_433.2278	1.1127	0.9325	0.9796	0.7	0.8766	0.3104	SAT:PBS	C18:neg		C18 H36 N5 O3 P S	433.228	9.485								0	level5						other
9.496_513.3053	1.1234	0.1141	0.71	0.1	0.5784	0.6779	SAT:PBS	C18:neg	O-(hydroxy{(2r)-2-hydroxy-3-[(2-methoxyhexadecyl)oxy]propoxy}phosphoryl)-l-serine	C23 H48 N O9 P	513.305	9.496		S113376780		-0.0014	-2.6459			3	level4						other
9.507_435.2434	1.0953	0.5077	0.8138	1	1	0.294	SAT:PBS	C18:neg		C24 H37 N O4 S	435.243	9.507								0	level5						other
9.51_644.2959	0.9802	0.9983	1	1	1	0.1182	SAT:PBS	C18:neg	(2r)-2-hydroxy-3-[(hydroxy{[(1s,2r,3r,4s,5s,6r)-2,3,4,5,6-pentahydroxycyclohexyl]oxy}phosphoryl)oxy]propyl (4z,7z,10z,13z,16z,19z)-4,7,10,13,16,19-docosahexaenoate	C31 H49 O12 P	644.296	9.51		S113378802		-0.0003	-0.4367			1	level4						other
9.515_387.2436	0.9231	0.5279	0.818	1	1	0.4702	SAT:PBS	C18:neg	2-[(9z,12z)-9,12-octadecadienoylamino]ethanesulfonic acid	C20 H37 N O4 S	387.244	9.515		S113368758		-0.0008	-2.0098			1	level4						other
9.515_587.3214	1.2541	0.4291	0.7716	0.4	0.7765	0.7998	SAT:PBS	C18:neg	Retaspimycin	C31 H45 N3 O8	587.321	9.515		S25038261		0.0007	1.2548			1	level4						other
9.539_563.3216	0.9872	0.8616	0.9459	1	1	0.128	SAT:PBS	C18:neg	(2r)-3-{[(2-aminoethoxy)(hydroxy)phosphoryl]oxy}-2-[(4-oxobutanoyl)oxy]propyl (9z)-9-octadecenoate	C27 H50 N O9 P	563.322	9.539		S113380853		-0.0007	-1.1952			1	level4						other
9.54_556.2795	0.8816	0.5617	0.8368	0.7	0.8766	0.4834	SAT:PBS	C18:neg	(2r)-3-({[(2s)-2,3-dihydroxypropoxy](hydroxy)phosphoryl}oxy)-2-hydroxypropyl (4z,7z,10z,13z,16z,19z)-4,7,10,13,16,19-docosahexaenoate	C28 H45 O9 P	556.279	9.54		S113377819		-0.0006	-1.1328			1	level4						other
9.551_532.2784	0.7566	0.273	0.7494	0.4	0.7765	0.6681	SAT:PBS	C18:neg	(2r)-3-({[(2s)-2,3-dihydroxypropoxy](hydroxy)phosphoryl}oxy)-2-hydroxypropyl (5z,8z,11z,14z)-5,8,11,14-icosatetraenoate	C26 H45 O9 P	532.278	9.551		S24823106		-0.0017	-3.2398			1	level4						other
9.569_276.2083	0.5117	0.0197	0.4046	0.1	0.5784	2.1961	SAT:PBS	C18:neg	(e)-parinaric acid	C18 H28 O2	276.208	9.569		S4445965		-0.0007	-2.4756			78	level4						down
9.581_508.2788	0.8048	0.614	0.8633	1	1	0.3707	SAT:PBS	C18:neg	(2r)-2-[(5-oxopentanoyl)oxy]-3-(phosphonooxy)propyl palmitate	C24 H45 O9 P	508.279	9.581		S113381002		-0.0013	-2.509			2	level4						other
9.586_240.0665	0.9349	0.7008	0.8946	0.7	0.8766	0.2152	SAT:PBS	C18:neg	1-(propyldisulfanyl)-1-(propylsulfinyl)propane	C9 H20 O S3	240.066	9.586		S35013539	HMDB0033071	-0.0012	-4.8615			1	level4	Organosulfur compounds	Sulfoxides	null	Sulfoxides		other
9.597_272.2345	0.6626	0.382	0.7653	0.7	0.8766	1.9438	SAT:PBS	C18:neg	16-hydroxyhexadecanoic acid	C16 H32 O3	272.235	9.597	C18218	MReference-2551	HMDB0006294	-0.0007	-2.4645		85.4	25	level2	Lipids and lipid-like molecules	Fatty Acyls	Fatty acids and conjugates	Fatty acyls[FA]	map01100 Metabolic pathways;	other
9.602_482.2421	0.7047	0.6053	0.8553	0.7	0.8766	0.7311	SAT:PBS	C18:neg	(2r)-2-hydroxy-3-(phosphonooxy)propyl (4z,7z,10z,13z,16e,19e)-4,7,10,13,16,19-docosahexaenoate	C25 H39 O7 P	482.242	9.602		S59664361		-0.0012	-2.4672			3	level4						other
9.614_567.2954	1.3015	0.2149	0.7494	0.4	0.7765	0.872	SAT:PBS	C18:neg		C23 H47 N5 O7 P2	567.295	9.614								0	level5						other
9.618_505.2791	0.6664	0.0586	0.5867	0.1	0.5784	1.1785	SAT:PBS	C18:neg		C22 H45 N5 O2 P2 S	505.279	9.618								0	level5						other
9.624_539.3207	1.0599	0.2386	0.7494	0.2	0.6759	0.2808	SAT:PBS	C18:neg	O-{hydroxy[(2r)-2-hydroxy-3-{[(6z)-2-methoxy-6-octadecen-1-yl]oxy}propoxy]phosphoryl}-l-serine	C25 H50 N O9 P	539.321	9.624		S113376782		-0.0017	-3.0707			2	level4						other
9.626_543.2944	1.4388	0.0892	0.6739	0.2	0.6759	0.9042	SAT:PBS	C18:neg		C21 H47 N5 O7 P2	543.294	9.626								0	level5						other
9.628_453.2843	0.6113	0.3082	0.7494	0.7	0.8766	1.1696	SAT:PBS	C18:neg	Glycerophospho-n-palmitoyl ethanolamine	C21 H44 N O7 P	453.284	9.628		MReference-2955		-0.0012	-2.6505		88.9	5	level2						other
9.637_434.2424	0.7919	0.7028	0.8946	0.7	0.8766	0.4123	SAT:PBS	C18:neg	1-linoleyl-sn-glycerol 3-phosphate	C21 H39 O7 P	434.242	9.637		S24766514		-0.0009	-2.092			5	level4						other
9.643_519.2945	1.4151	0.0336	0.4189	0.1	0.5784	0.891	SAT:PBS	C18:neg	4-[(2-hydroxy-4-methylpentanoyl)amino]-7-isobutyl-3-isopropyl-5,8-dioxo-2-oxa-6,9-diazabicyclo[10.2.2]hexadeca-1(14),12,15-triene-10-carboxylic acid	C27 H41 N3 O7	519.294	9.643		S35013642	HMDB0033617	0.0001	0.111			1	level4	Organic acids and derivatives	Carboxylic acids and derivatives	Amino acids, peptides, and analogues	Amino acids, peptides, and analogues		other
9.646_687.339	0.5999	0.4427	0.7785	0.7	0.8766	1.1728	SAT:PBS	C18:neg	1-deoxy-1-{[(7r,12z,15z,18z,21z,24z,27z)-4-hydroxy-7-(hydroxymethyl)-4-oxido-9-oxo-3,5,8-trioxa-4lambda~5~-phosphatriaconta-12,15,18,21,24,27-hexaen-1-yl]amino}-beta-d-fructopyranose	C33 H54 N O12 P	687.339	9.646		S113381063		0.0006	0.9428			2	level4						other
9.666_663.3378	0.7197	0.5781	0.849	0.7	0.8766	0.6508	SAT:PBS	C18:neg	O-(hydroxy{(2r)-2-{[(5e)-4-hydroxy-7-oxo-5-heptenoyl]oxy}-3-[(9z)-9-octadecenoyloxy]propoxy}phosphoryl)-l-serine	C31 H54 N O12 P	663.338	9.666		S113380905		-0.0006	-0.9163			1	level4						other
9.668_565.3372	1.0181	0.8852	0.9568	1	1	0.1587	SAT:PBS	C18:neg		C27 H52 N O9 P	565.337	9.668								0	level5						other
9.685_639.3381	0.7646	0.3866	0.7653	0.4	0.7765	0.7643	SAT:PBS	C18:neg	1-deoxy-1-{[(7r,17z,20z)-4-hydroxy-7-(hydroxymethyl)-4-oxido-9-oxo-3,5,8-trioxa-4lambda~5~-phosphahexacosa-17,20-dien-1-yl]amino}-beta-d-fructopyranose	C29 H54 N O12 P	639.338	9.685		S113381064		-0.0003	-0.4024			2	level4						other
9.687_622.3117	0.8669	0.7015	0.8946	1	1	0.3508	SAT:PBS	C18:neg	(2r)-3-({[(2s)-2,3-dihydroxypropoxy](hydroxy)phosphoryl}oxy)-2-{[(5e)-4,7-dioxo-5-heptenoyl]oxy}propyl palmitate	C29 H51 O12 P	622.312	9.687		S113380961		-0.0001	-0.2274			2	level4						other
9.722_613.3381	0.998	0.9408	0.9816	1	1	0.0544	SAT:PBS	C18:neg		C31 H52 N O9 P	613.338	9.722								0	level5						other
9.725_527.3204	1.0275	0.7268	0.8946	0.7	0.8766	0.1759	SAT:PBS	C18:neg		C22 H51 N5 O3 P2 S	527.32	9.725								0	level5						other
9.741_589.337	1.1434	0.1025	0.6996	0.1	0.5784	0.4442	SAT:PBS	C18:neg		C29 H52 N O9 P	589.337	9.741								0	level5						other
9.762_1020.6182	0.7706	0.5635	0.8368	0.7	0.8766	0.5781	SAT:PBS	C18:neg		C50 H95 N4 O11 P3	1020.62	9.762								0	level5						other
9.769_565.3372	1.3097	0.4119	0.769	0.7	0.8766	1.1562	SAT:PBS	C18:neg		C27 H52 N O9 P	565.337	9.769								0	level5						other
9.777_326.2236	0.959	0.8147	0.9309	1	1	0.2242	SAT:PBS	C18:neg	Promegestone	C22 H30 O2	326.224	9.777	C14208	S33716		-0.0009	-2.8867			5	level4					NULL	other
9.78_536.4059	1.1702	0.4348	0.7744	0.4	0.7765	0.5673	SAT:PBS	C18:neg		C25 H56 N6 O4 S	536.406	9.78								0	level5						other
9.781_996.6188	0.8814	0.4185	0.7698	0.7	0.8766	0.3848	SAT:PBS	C18:neg		C44 H94 N4 O16 P2	996.619	9.781								0	level5						other
9.787_302.2239	0.8908	0.4886	0.8006	0.7	0.8766	0.3154	SAT:PBS	C18:neg	Cis-5,8,11,14,17-eicosapentaenoic acid	C20 H30 O2	302.224	9.787	C06428	MReference-348	HMDB0001999	-0.0007	-2.3341		88.2	65	level2	Lipids and lipid-like molecules	Fatty Acyls	Fatty acids and conjugates	Fatty acyls[FA]	map01040 Biosynthesis of unsaturated fatty acids;	other
9.81_567.2411	0.0757	0.1848	0.7494	0.2	0.6759	3.393	SAT:PBS	C18:neg		C20 H48 N3 O7 P3 S	567.241	9.81								0	level5						other
9.834_553.3361	1.0091	0.9879	0.9929	0.7	0.8766	0.2417	SAT:PBS	C18:neg	O-{hydroxy[(2r)-2-hydroxy-3-(icosanoyloxy)propoxy]phosphoryl}-l-serine	C26 H52 N O9 P	553.336	9.834		S113376748		-0.0019	-3.4393			1	level4						other
9.855_615.3535	0.8919	0.3149	0.7494	0.4	0.7765	0.5555	SAT:PBS	C18:neg		C31 H54 N O9 P	615.354	9.855								0	level5						other
9.891_254.224	0.5843	0.048	0.5081	0.1	0.5784	1.8473	SAT:PBS	C18:neg	Palmitoleic acid	C16 H30 O2	254.224	9.891	C08362	MReference-1256	HMDB0003229	-0.0006	-2.4591		75.9	62	level2	Lipids and lipid-like molecules	Fatty Acyls	Fatty acids and conjugates	Fatty acyls[FA]	map00061 Fatty acid biosynthesis;	down
9.903_591.3526	1.1055	0.3182	0.7494	0.4	0.7765	0.3917	SAT:PBS	C18:neg		C29 H54 N O9 P	591.353	9.903								0	level5						other
9.942_585.3635	1.0094	0.9415	0.9816	1	1	0.1285	SAT:PBS	C18:neg		C31 H58 N O3 P3	585.364	9.942								0	level5						other
9.943_541.3363	0.7691	0.4133	0.769	1	1	1.1945	SAT:PBS	C18:neg	O-(hydroxy{(2r)-2-hydroxy-3-[(2-methoxyoctadecyl)oxy]propoxy}phosphoryl)-l-serine	C25 H52 N O9 P	541.336	9.943		S113376783		-0.0017	-3.1319			1	level4						other
9.944_1036.6707	0.9512	0.3078	0.7494	0.4	0.7765	0.3526	SAT:PBS	C18:neg		C48 H103 N4 O13 P3	1036.67	9.944								0	level5						other
9.956_823.5732	0.8065	0.4267	0.7706	0.4	0.7765	0.7445	SAT:PBS	C18:neg	O-(hydroxy{(2r)-2-[(5z,8z,11z,14z)-5,8,11,14-icosatetraenoyloxy]-3-[(1z)-1-icosen-1-yloxy]propoxy}phosphoryl)-l-serine	C46 H82 N O9 P	823.573	9.956		S113376735		0.0004	0.5174			3	level4						other
9.963_328.2396	0.8273	0.4335	0.7744	0.7	0.8766	0.6752	SAT:PBS	C18:neg	Docosahexaenoic acid	C22 H32 O2	328.24	9.963	C06429	MReference-6801	HMDB0002183	-0.0007	-2.0563		87	17	level2	Lipids and lipid-like molecules	Fatty Acyls	Fatty acids and conjugates	Fatty acyls[FA]	map01040 Biosynthesis of unsaturated fatty acids;	other
9.986_396.2268	1.0646	0.3199	0.7494	0.4	0.7765	0.2883	SAT:PBS	C18:neg	Dinaciclib	C21 H28 N6 O2	396.227	9.986		S25027387		-0.0005	-1.361			1	level4						other
9.991_632.4804	0.8101	0.2952	0.7494	0.4	0.7765	0.6357	SAT:PBS	C18:neg	(2r)-1-(octadecyloxy)-3-(phosphonooxy)-2-propanyl (9z)-9-tetradecenoate	C35 H69 O7 P	632.48	9.991		S113379335		0.0023	3.6681			5	level4						other
9.995_350.245	0.7396	0.4245	0.7706	0.7	0.8766	1.1008	SAT:PBS	C18:neg	10-gingerol	C21 H34 O4	350.245	9.995	C17496	S147055	HMDB0033616	-0.0007	-1.8764			20	level4	Benzenoids	Phenols	Methoxyphenols	Phenols and derivatives	NULL	other
